# Supplementary material for: Improved i-motif thermal stability by insertion of anthraquinone monomers
Source: Royal Society of Chemistry journal article supplement (doi:10.1039/c7ob01393k), 2017-01-01

## SUPPLEMENTARY INFORMATION

### Modulation of i-Motif Thermal Stability by Insertion of Anthraquinone Monomers

Alaa S. Gouda <sup>a, b</sup>, Mahasen S. Amine <sup>b</sup> and Erik B. Pedersen <sup>\*a</sup>

<sup>a</sup>Department of Physics, Chemistry and Pharmacy, University of Southern Denmark, Campusvej 55, 5230

Odense M, Denmark. Fax +45 66158780; \*E-mail: erik@sdu.dk

<sup>b</sup>Department of Chemistry, Faculty of Science, Benha University, Benha, Egypt13518.

**Circular Dichroism (CD) spectral analysis of human telomeric DNA (ON1) and anthraquinone-modified i-motif variants (ON2-ON33, Fig. S1-S3):**

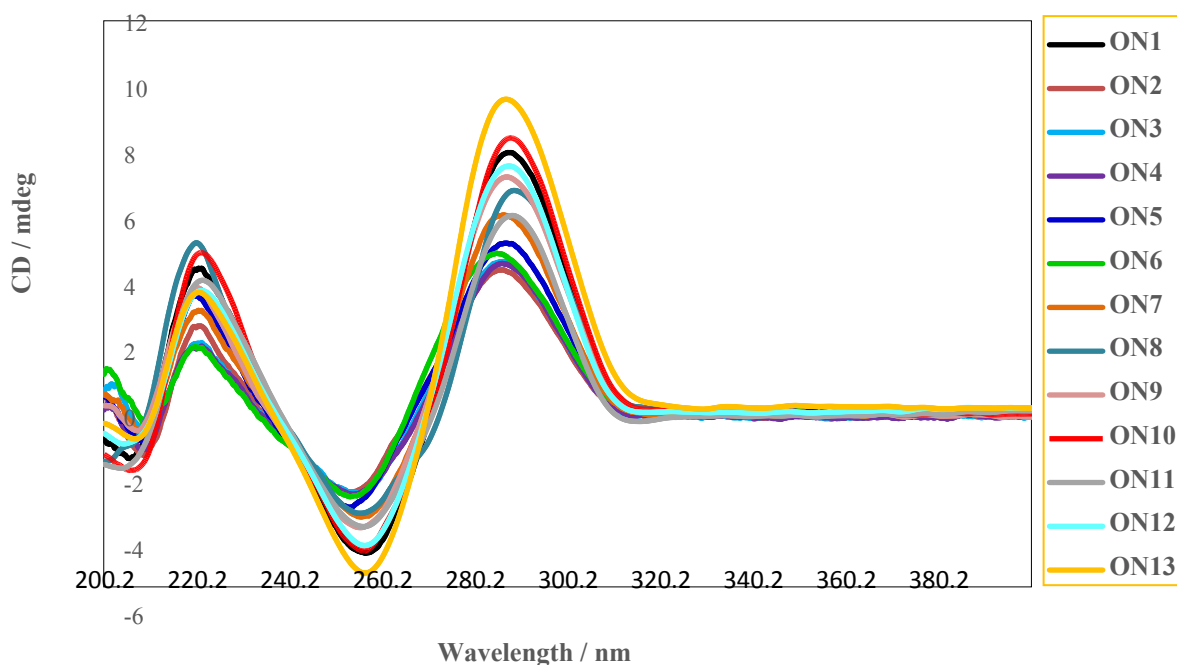

**Figure S1.** Circular dichroism (CD) spectra of human telomeric i-motif DNA (ON1) and anthraquinone-modified i-motif variants (ON2-ON13) measured at 20 °C. For sample composition see table 1.

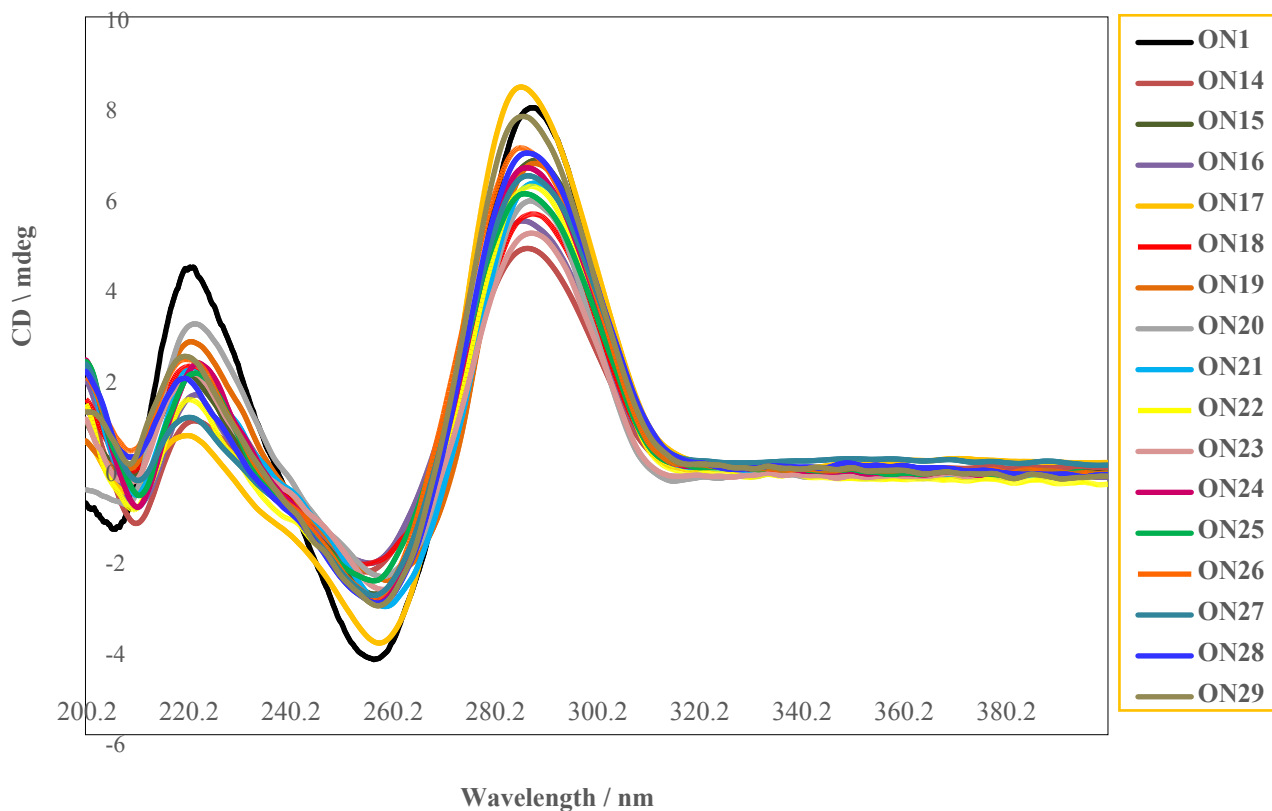

**Figure S2.** CD spectra of human telomeric i-motif DNA (ON1) and anthraquinone-modified i-motif variants (ON14-ON29) measured at 20 °C. For sample composition see table 1.

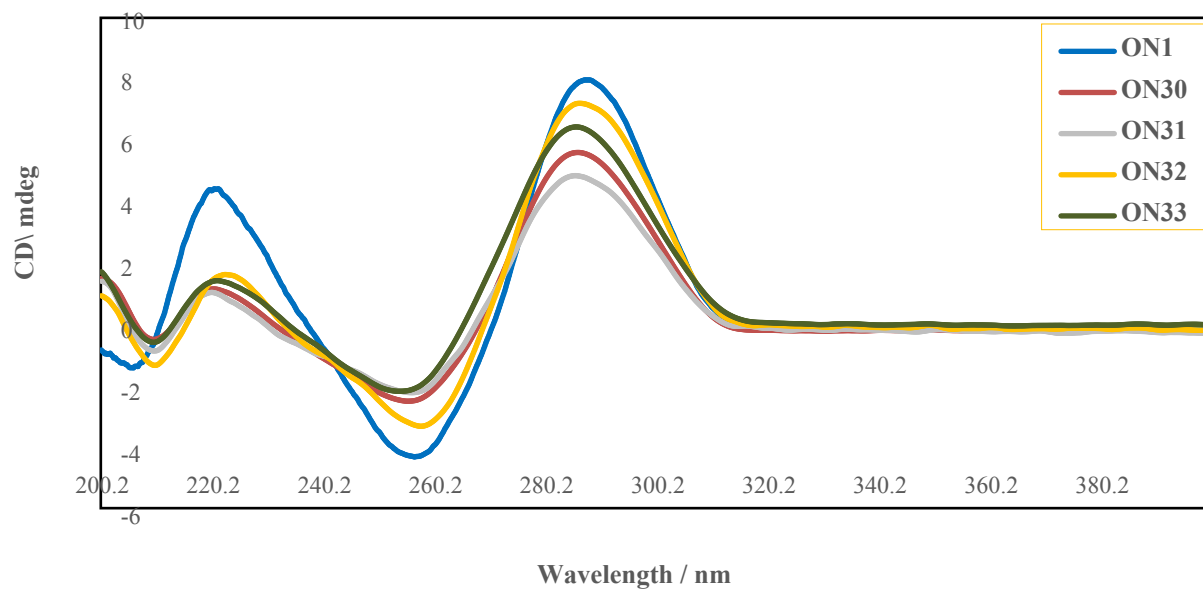

**Figure S3.** CD spectra of human telomeric i-motif DNA (ON1) and anthraquinone-modified i-motif variants (ON30-ON33) measured at 20 °C. For sample composition see table 1.

**Normalized UV absorption melting curves and first derivatives of human telomeric i-motif DNA (ON1) and anthraquinone-modified i-motif variants (ON2-ON33, Fig S4-S6):**

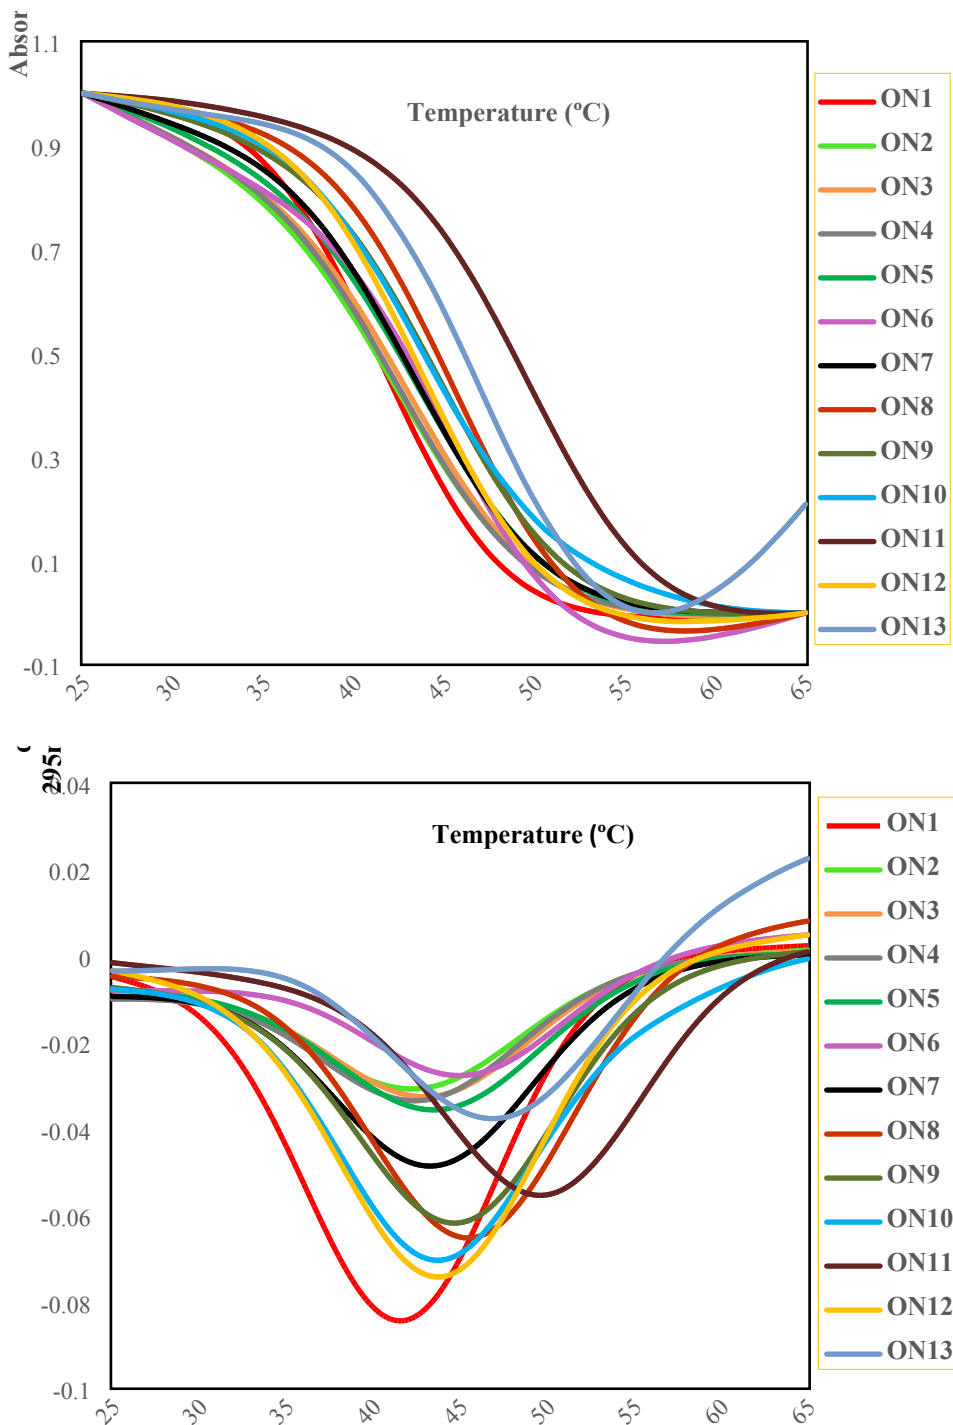

**Figure S4.** Normalized UV absorption melting curves (Up) and first derivatives (Down) versus temperature difference (0.5 °C/min) from 25-65 °C for i-motifs (ON1-ON13) at 295 nm (4  $\mu$ M) in potassium buffer (100 mM KCl + 20 mM K<sub>2</sub>HPO<sub>4</sub> (pH= 5.5) and 1 mM K<sub>2</sub>EDTA). Melting temperatures are within the uncertainty  $\pm$  0.5 °C as determined by repetitive experiments and  $T_m$  values were calculated taking an average of the two melting curves.

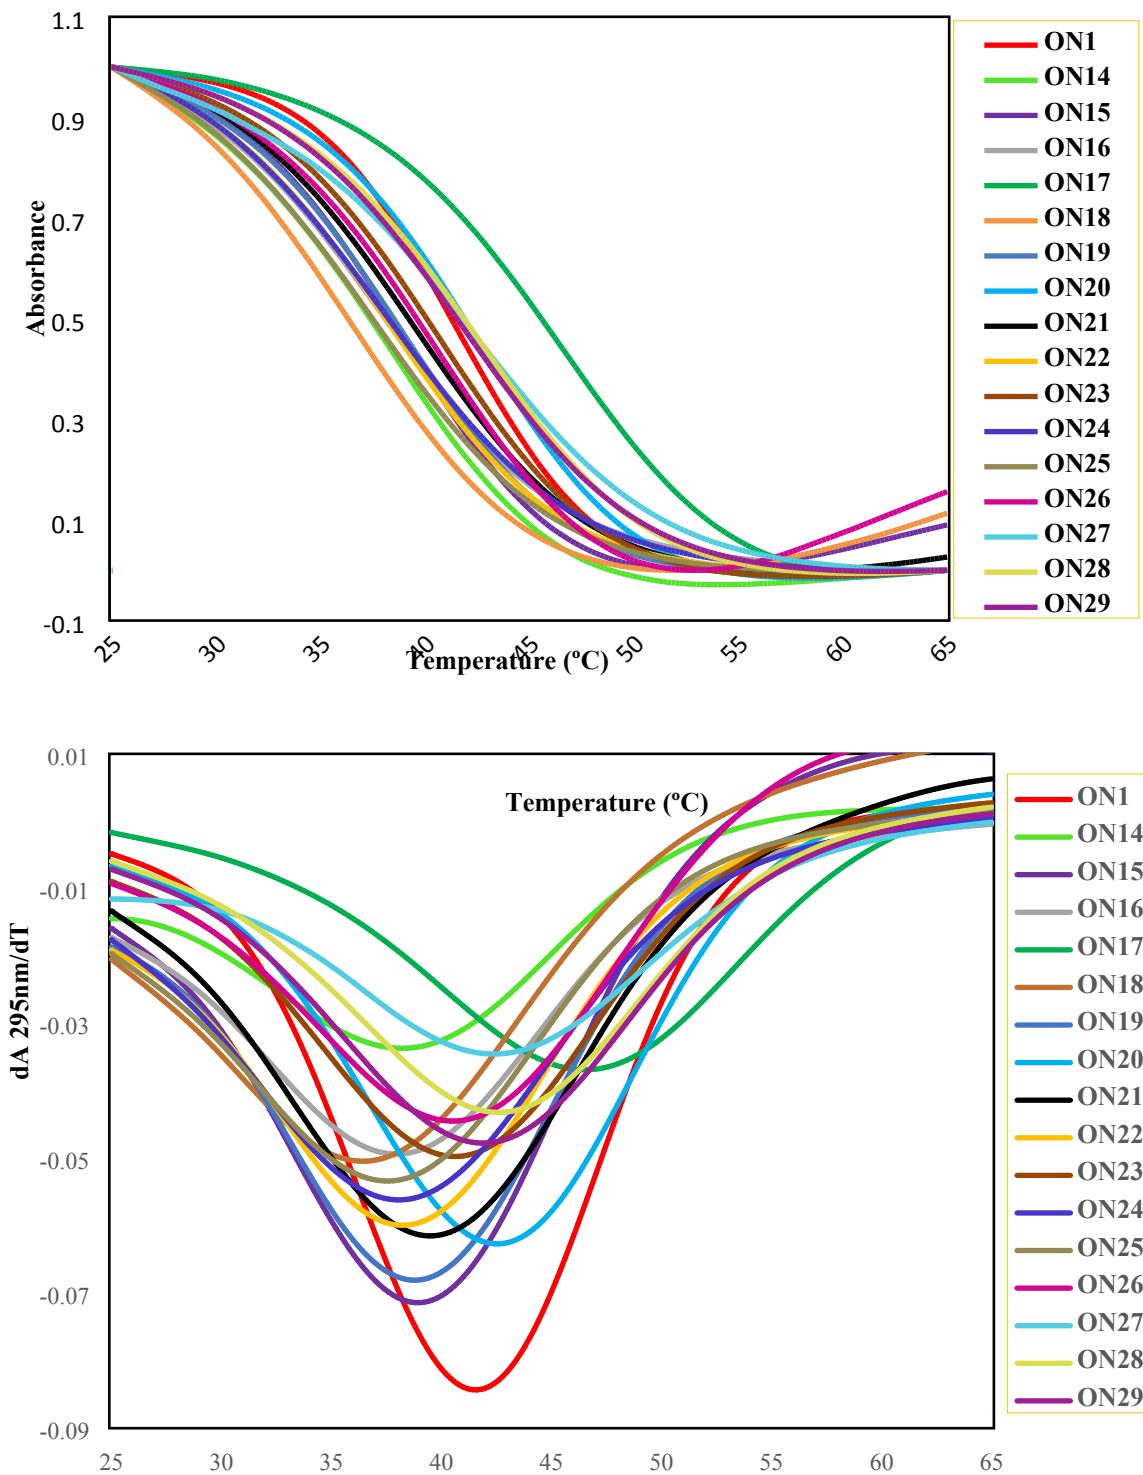

**Figure S5.** Normalized UV absorption melting curves (Up) and first derivatives (Down) versus temperature difference (0.5 °C/min) from 25-65 °C for i-motifs (ON1 and ON14-ON29) at 295 nm (4  $\mu$ M) in potassium buffer (100 mM KCl + 20 mM  $K_2HPO_4$  (pH= 5.5) and 1 mM  $K_2EDTA$ ). Melting temperatures are within the uncertainty  $\pm 0.5$  °C as determined by repetitive experiments and  $T_m$  values were calculated taking an average of the two melting curves.

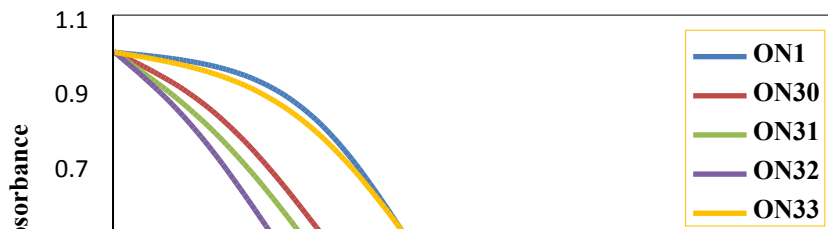

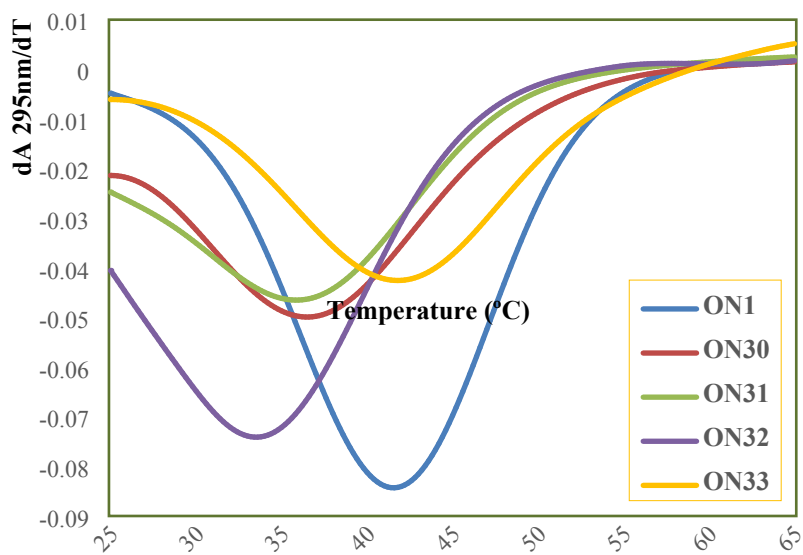

**Figure S6.** Normalized UV absorption melting curves (Up) and first derivatives (Down) versus temperature difference (0.5 °C/min) from 25-65 °C for i-motifs (**ON1** and **ON30-ON33**) at 295 nm (4 μM) in potassium buffer (100 mM KCl + 20 mM K<sub>2</sub>HPO<sub>4</sub> (pH= 5.5) and 1 mM K<sub>2</sub>EDTA). Melting temperatures are within the uncertainty ± 0.5 °C as determined by repetitive experiments and  $T_m$  values were calculated taking an average of the two melting curves.

|                                                                                           |
|-------------------------------------------------------------------------------------------|
| <b>Table S1. MALDI-TOF mass spectrometry data (calculated and found mass) of i-Motifs</b> |
|-------------------------------------------------------------------------------------------|

| Oligo | bases replaced                 | Sequence                                                         | M <sub>calcd</sub> | M <sub>found</sub> |
|-------|--------------------------------|------------------------------------------------------------------|--------------------|--------------------|
| ON1   | wild type                      | 5'-CCC TAA CCC TAA CCC TAA CCC T-3'                              | 6504.44            | 6504.13            |
| ON2   | T <sub>10</sub>                | 5'-CCC TAA CCC H <sub>18</sub> AA CCC TAA CCC T-3'               | 6617.43            | 6618.68            |
| ON3   | A <sub>11</sub>                | 5'-CCC TAA CCC TH <sub>18</sub> A CCC TAA CCC T-3'               | 6608.43            | 6608.07            |
| ON4   | A <sub>12</sub>                | 5'-CCC TAA CCC TAH <sub>18</sub> CCC TAA CCC T-3'                | 6608.43            | 6609.25            |
| ON5   | T <sub>10</sub>                | 5'-CCC TAA CCC H <sub>14</sub> AA CCC TAA CCC T-3'               | 6617.43            | 6617.38            |
| ON6   | A <sub>11</sub>                | 5'-CCC TAA CCC TH <sub>14</sub> A CCC TAA CCC T-3'               | 6608.43            | 6608.94            |
| ON7   | A <sub>12</sub>                | 5'-CCC TAA CCC TAH <sub>14</sub> CCC TAA CCC-T-3'                | 6608.43            | 6608.07            |
| ON8   | T <sub>10</sub>                | 5'-CCC TAA CCC H <sub>15</sub> AA CCC TAA CCC T-3'               | 6617.43            | 6618.29            |
| ON9   | A <sub>11</sub>                | 5'-CCC TAA CCC TH <sub>15</sub> A CCC TAA CCC T-3'               | 6608.43            | 6609.22            |
| ON10  | A <sub>12</sub>                | 5'-CCC TAA CCC TAH <sub>15</sub> CCC TAA CCC T-3'                | 6608.43            | 6609.30            |
| ON11  | T <sub>10</sub>                | 5'-CCC TAA CCC H <sub>26</sub> AA CCC TAA CCC T-3'               | 6617.43            | 6617.49            |
| ON12  | A <sub>11</sub>                | 5'-CCC TAA CCC TH <sub>26</sub> A CCC TAA CCC T-3'               | 6608.43            | 6608.65            |
| ON13  | A <sub>12</sub>                | 5'-CCC TAA CCC TAH <sub>26</sub> CCC TAA CCC-T-3'                | 6608.43            | 6608.36            |
| ON14  | A <sub>6</sub> T <sub>16</sub> | 5'-CCC TAH <sub>18</sub> CCC TAA CCC H <sub>18</sub> AA CCC T-3' | 6721.56            | 6722.74            |
| ON15  | A <sub>6</sub> T <sub>16</sub> | 5'-CCC TAH <sub>14</sub> CCC TAA CCC H <sub>14</sub> AA CCC T-3' | 6721.56            | 6722.85            |
| ON16  | A <sub>6</sub> T <sub>16</sub> | 5'-CCC TAH <sub>15</sub> CCC TAA CCC H <sub>15</sub> AA CCC T-3' | 6721.56            | 6728.08            |
| ON17  | A <sub>6</sub> T <sub>16</sub> | 5'-CCC TAH <sub>26</sub> CCC TAA CCC H <sub>26</sub> AA CCC T-3' | 6721.56            | 6721.66            |
| ON18  | A <sub>6</sub> T <sub>16</sub> | 5'-CCC TAH <sub>18</sub> CCC TAA CCC H <sub>14</sub> AA CCC T-3' | 6721.56            | 6723.44            |
| ON19  | A <sub>6</sub> T <sub>16</sub> | 5'-CCC TAH <sub>18</sub> CCC TAA CCC H <sub>15</sub> AA CCC T-3' | 6721.56            | 6725.84            |
| ON20  | A <sub>6</sub> T <sub>16</sub> | 5'-CCC TAH <sub>18</sub> CCC TAA CCC H <sub>26</sub> AA CCC T-3' | 6721.56            | 6721.66            |
| ON21  | A <sub>6</sub> T <sub>16</sub> | 5'-CCC TAH <sub>14</sub> CCC TAA CCC H <sub>18</sub> AA CCC T-3' | 6721.56            | 6722.85            |
| ON22  | A <sub>6</sub> T <sub>16</sub> | 5'-CCC TAH <sub>14</sub> CCC TAA CCC H <sub>15</sub> AA CCC T-3' | 6721.56            | 6724.04            |
| ON23  | A <sub>6</sub> T <sub>16</sub> | 5'-CCC TAH <sub>14</sub> CCC TAA CCC H <sub>26</sub> AA CCC T-3' | 6721.56            | 6722.76            |
| ON24  | A <sub>6</sub> T <sub>16</sub> | 5'-CCC TAH <sub>15</sub> CCC TAA CCC H <sub>18</sub> AA CCC T-3' | 6721.56            | 6723.74            |
| ON25  | A <sub>6</sub> T <sub>16</sub> | 5'-CCC TAH <sub>15</sub> CCC TAA CCC H <sub>14</sub> AA CCC-T-3' | 6721.56            | 6722.26            |
| ON26  | A <sub>6</sub> T <sub>16</sub> | 5'-CCC TAH <sub>15</sub> CCC TAA CCC H <sub>26</sub> AA CCC T-3' | 6721.56            | 6722.18            |
| ON27  | A <sub>6</sub> T <sub>16</sub> | 5'-CCC TAH <sub>26</sub> CCC TAA CCC H <sub>18</sub> AA CCC T-3' | 6721.56            | 6719.88            |
| ON28  | A <sub>6</sub> T <sub>16</sub> | 5'-CCC TAH <sub>26</sub> CCC TAA CCC H <sub>14</sub> AA CCC T-3' | 6721.56            | 6722.26            |
| ON29  | A <sub>6</sub> T <sub>16</sub> | 5'-CCC TAH <sub>26</sub> CCC TAA CCC H <sub>15</sub> AA CCC T-3' | 6721.56            | 6718.12            |
| ON30  | A <sub>18</sub>                | 5'-CCC TAA CCC TAA CCC TAH <sub>18</sub> CCC T-3'                | 6608.43            | 6608.28            |
| ON31  | A <sub>18</sub>                | 5'-CCC TAA CCC TAA CCC TAH <sub>14</sub> CCC-T-3'                | 6608.43            | 6612.98            |
| ON32  | A <sub>18</sub>                | 5'-CCC TAA CCC TAA CCC TAH <sub>15</sub> CCC T-3'                | 6608.43            | 6608.36            |
| ON33  | A <sub>18</sub>                | 5'-CCC TAA CCC TAA CCC TAH <sub>26</sub> CCC T-3'                | 6608.43            | 6609.83            |

**Maldi-TOF Mass Spectrometry Data of Oligonucleotides (ON1-ON33)**

### ON1

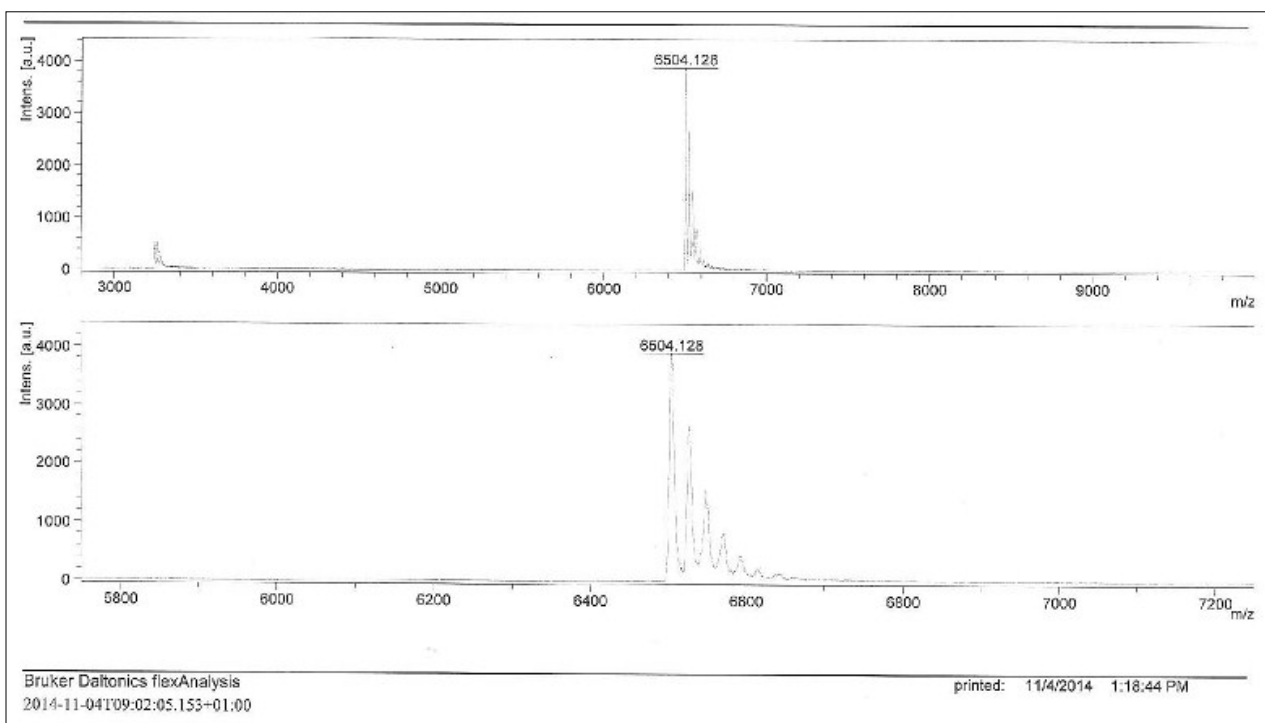

### ON2

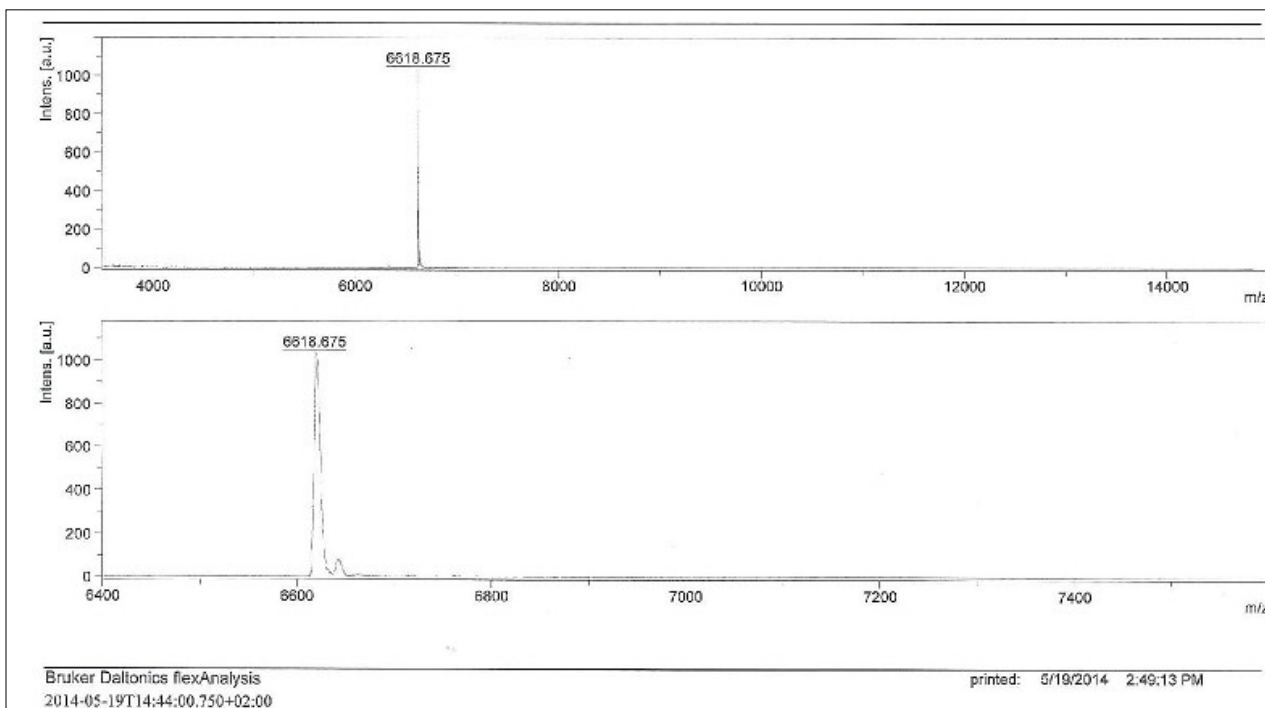

### ON3

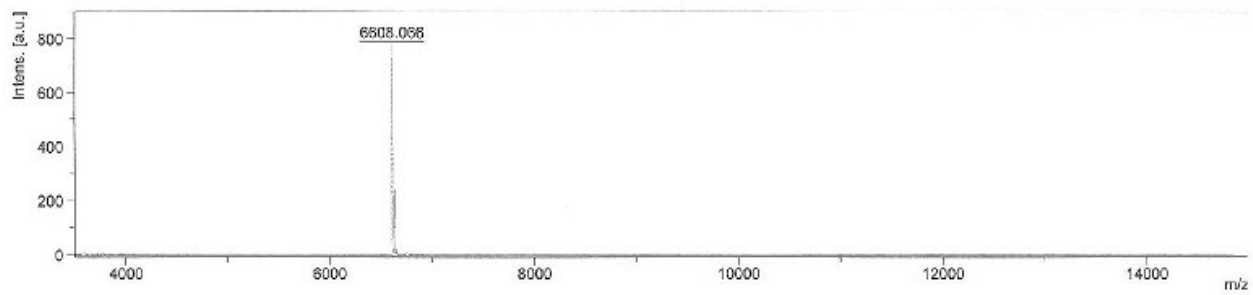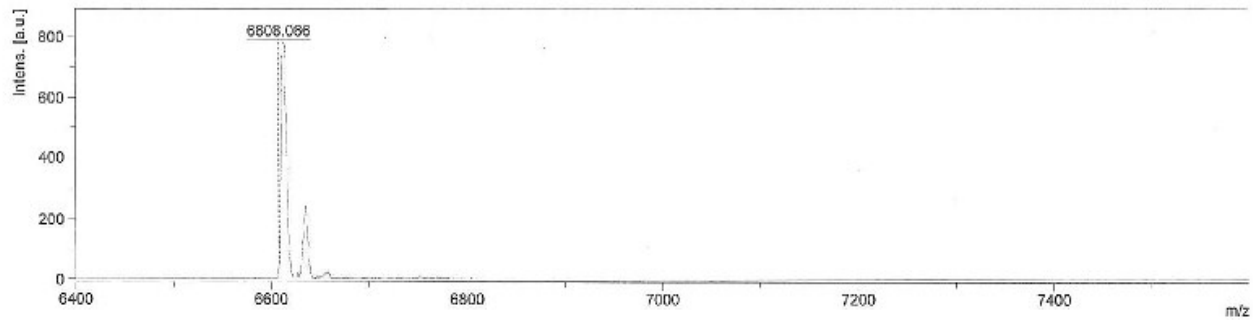



# ON4

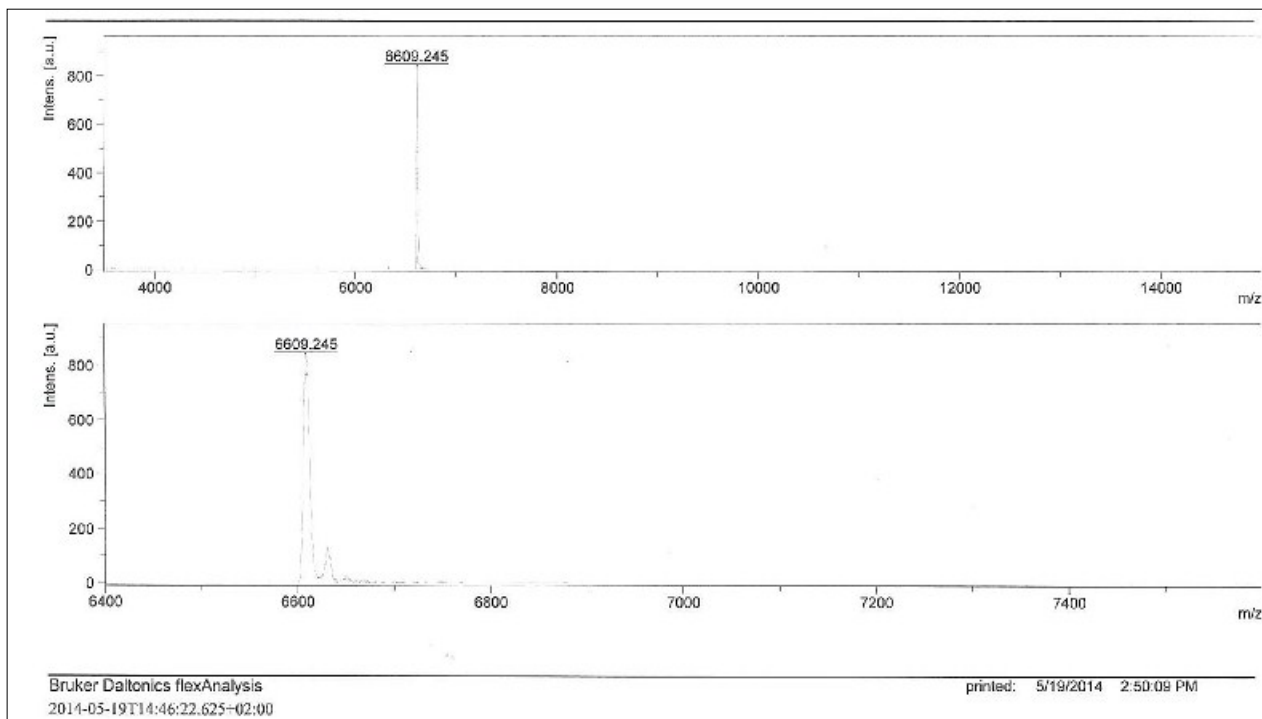

# ON5

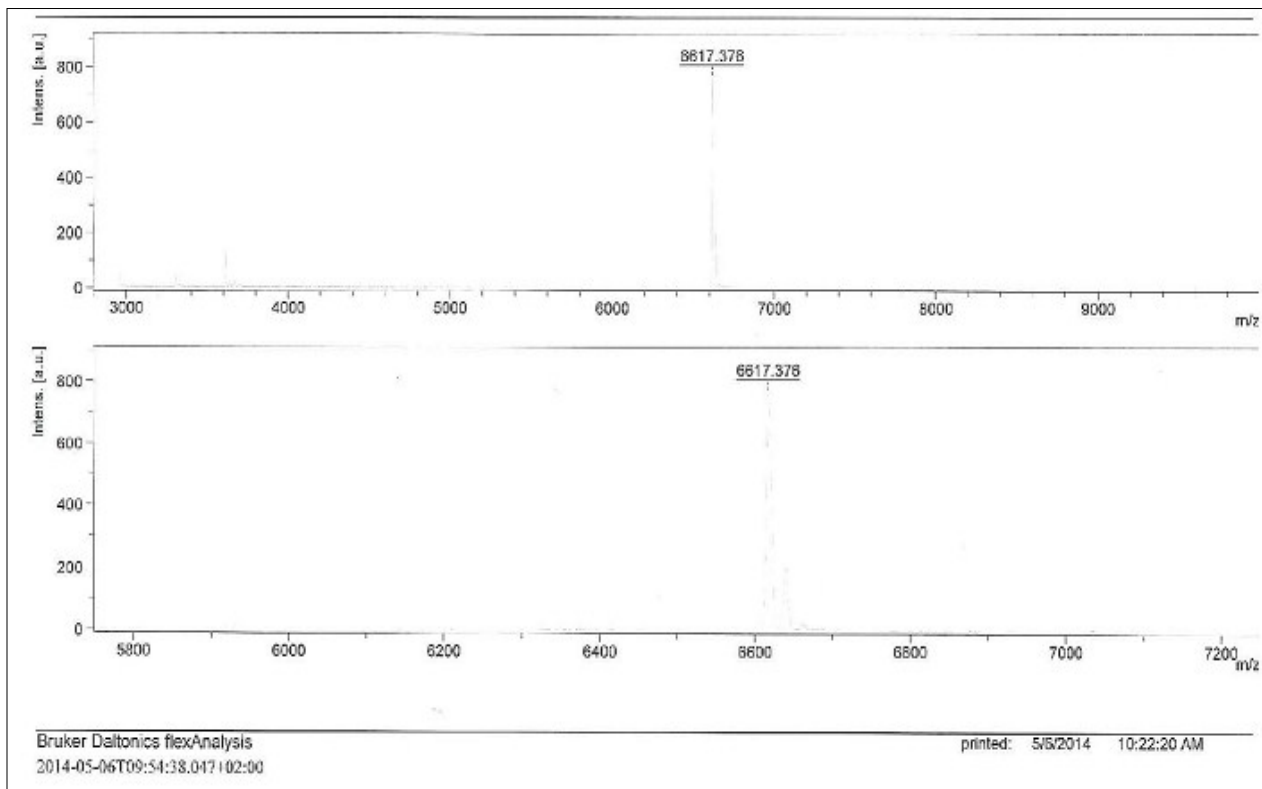

# ON6

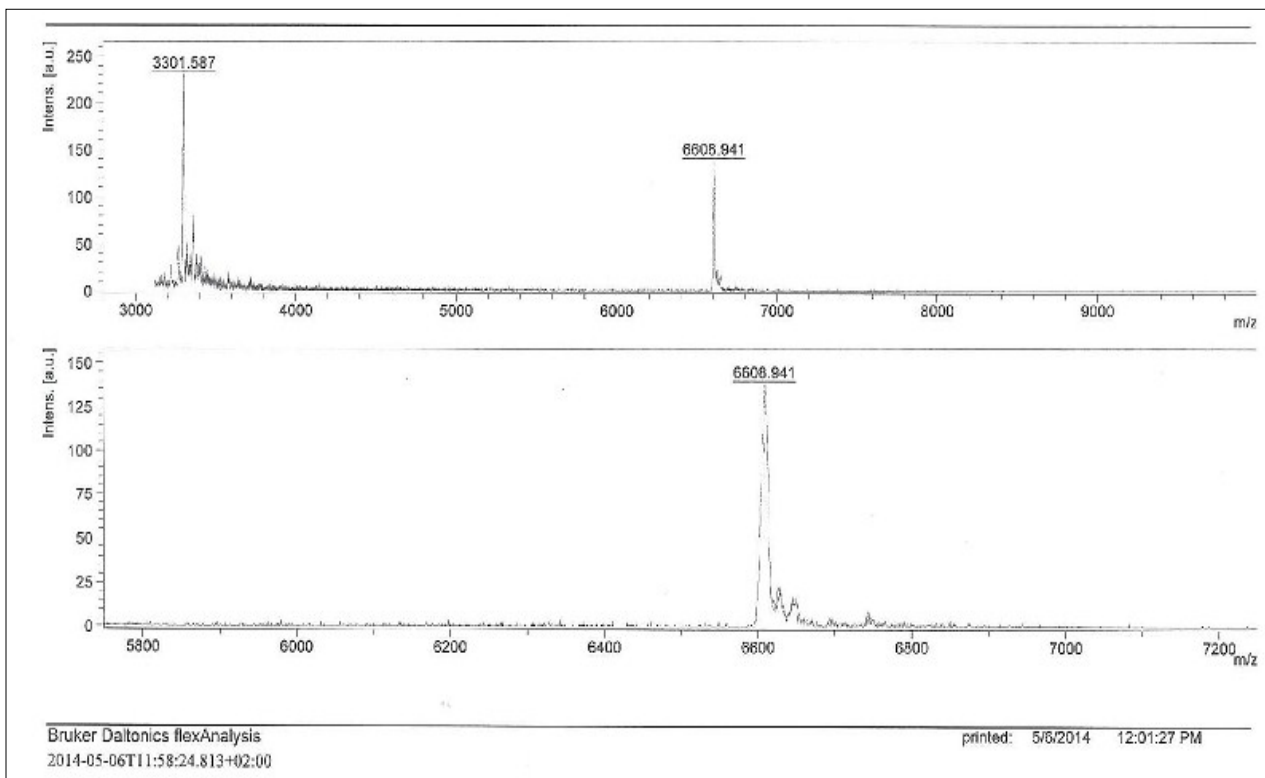

# ON7

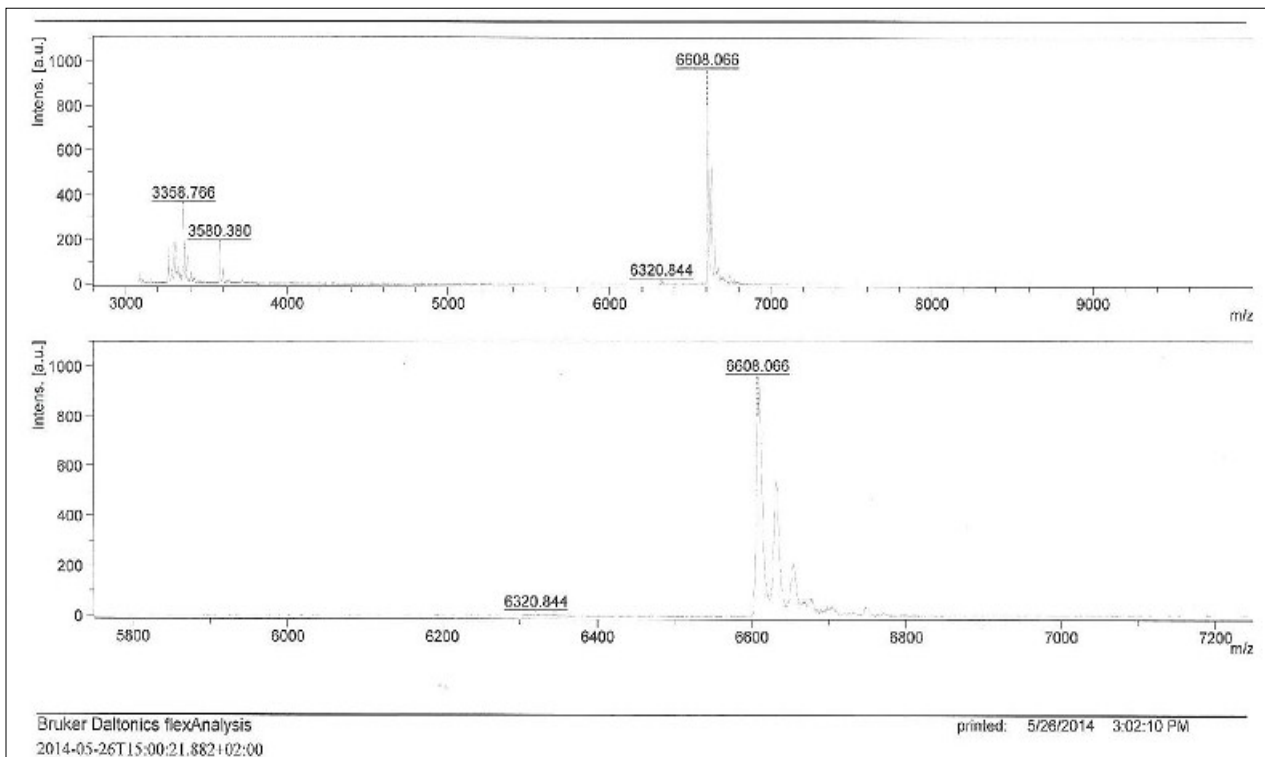

### ON8

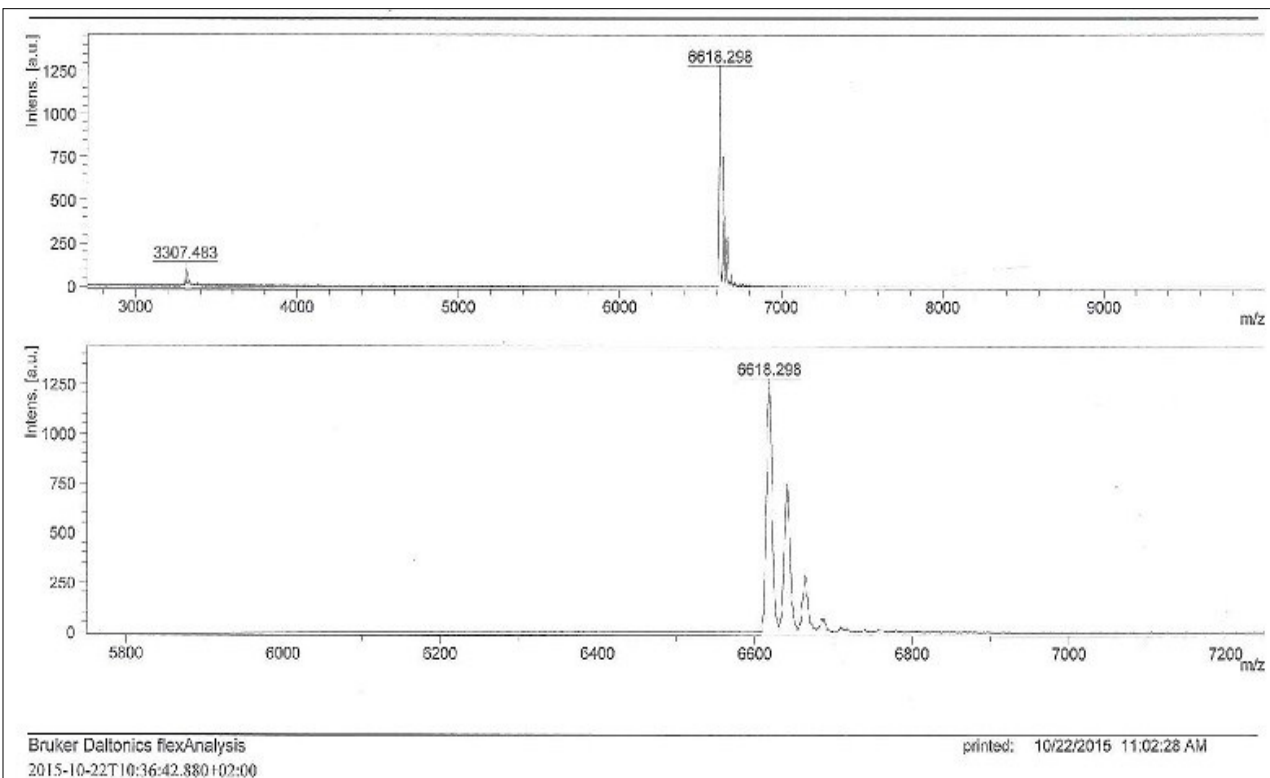

### ON9

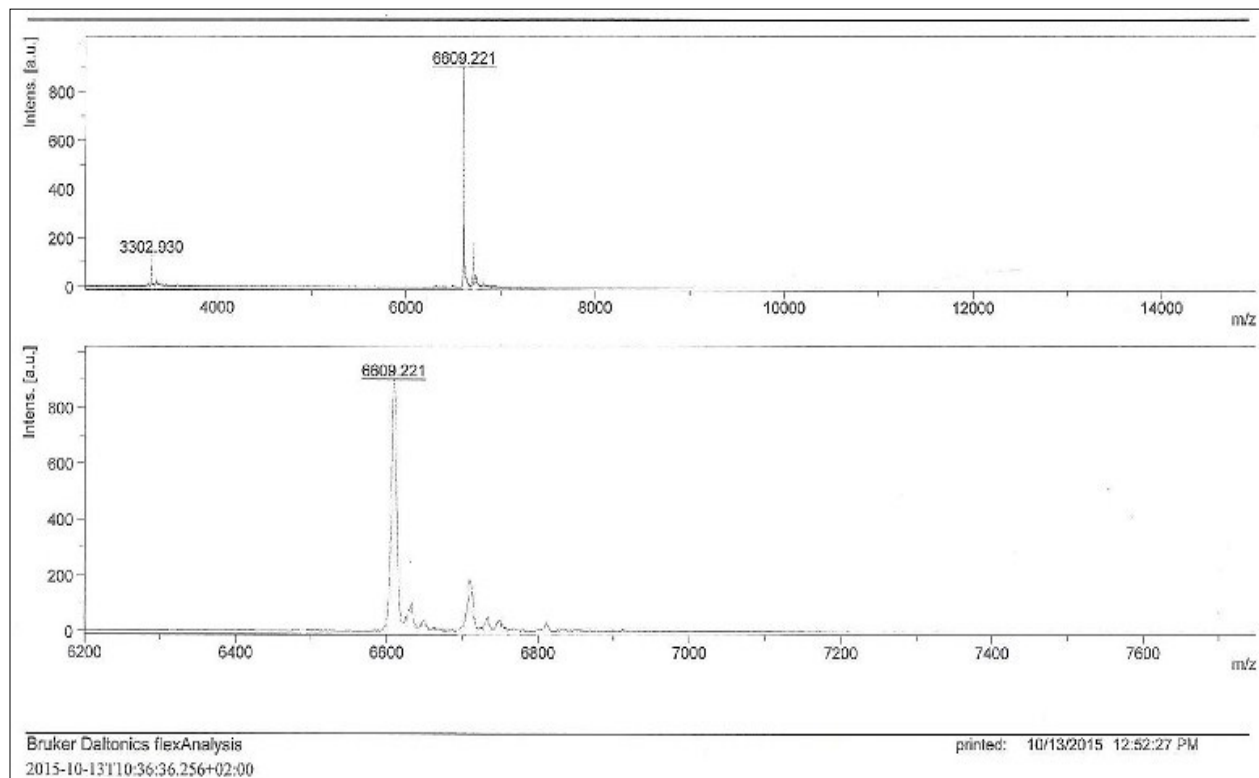

# ON10

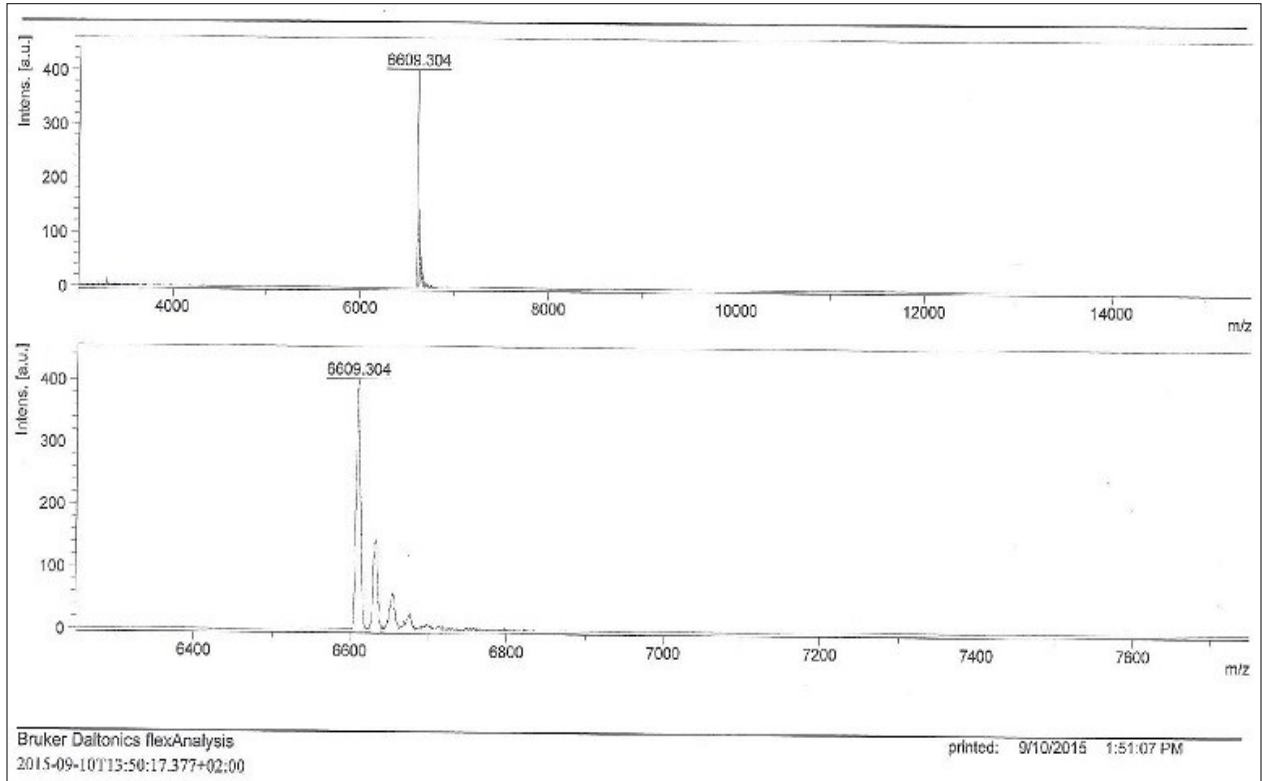

# ON11

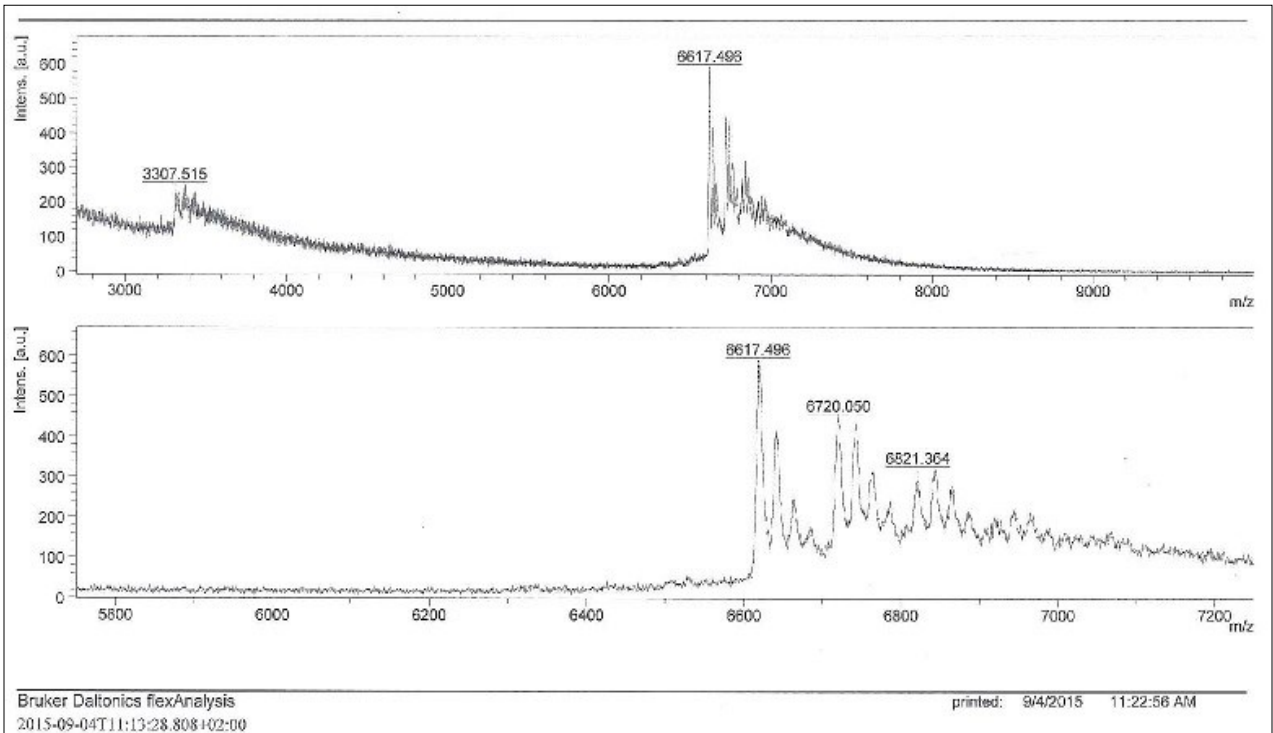

# ON12

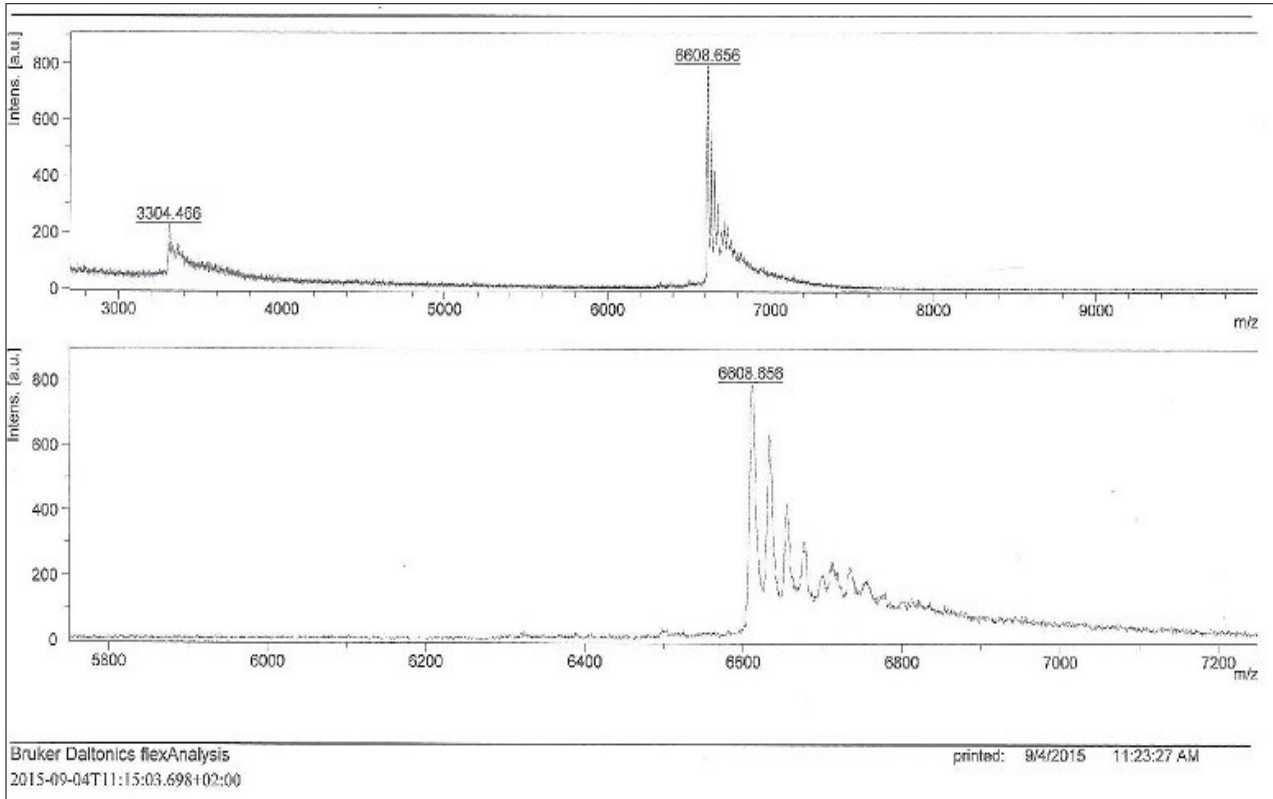

# ON13

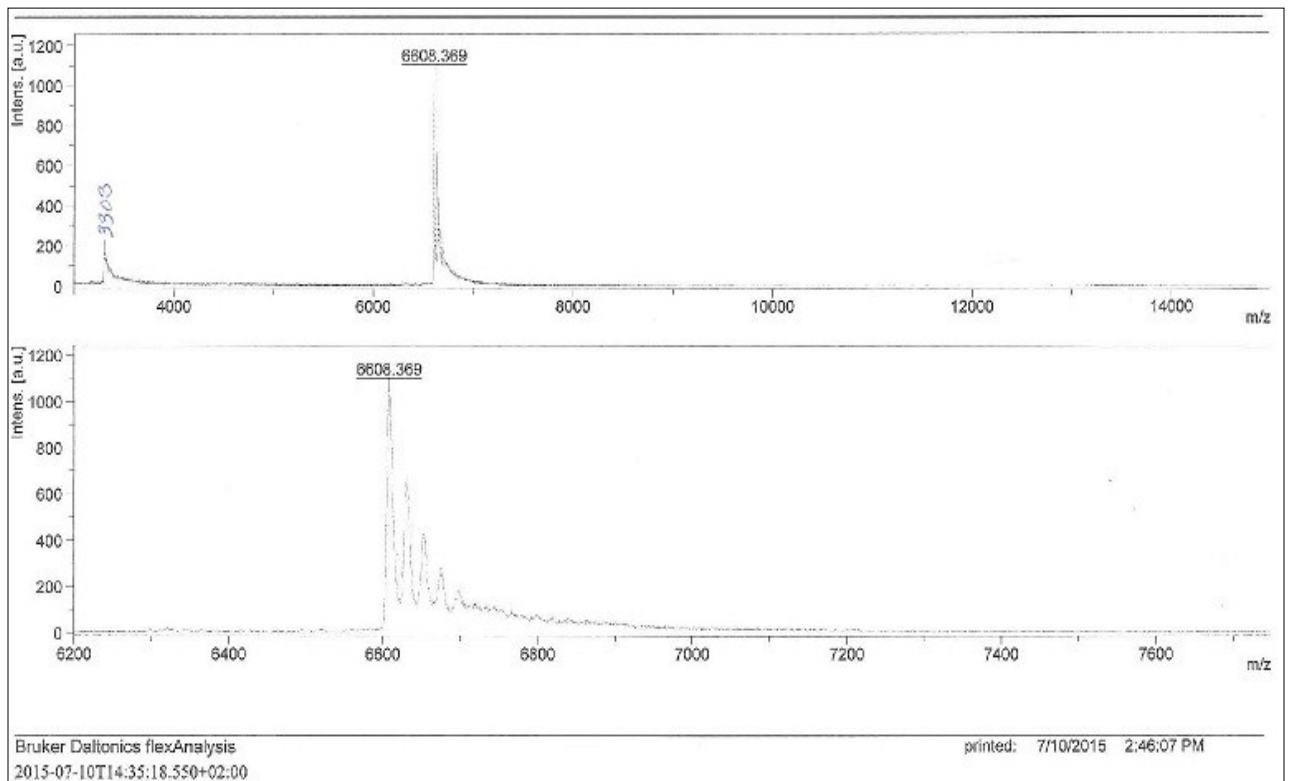

# ON14

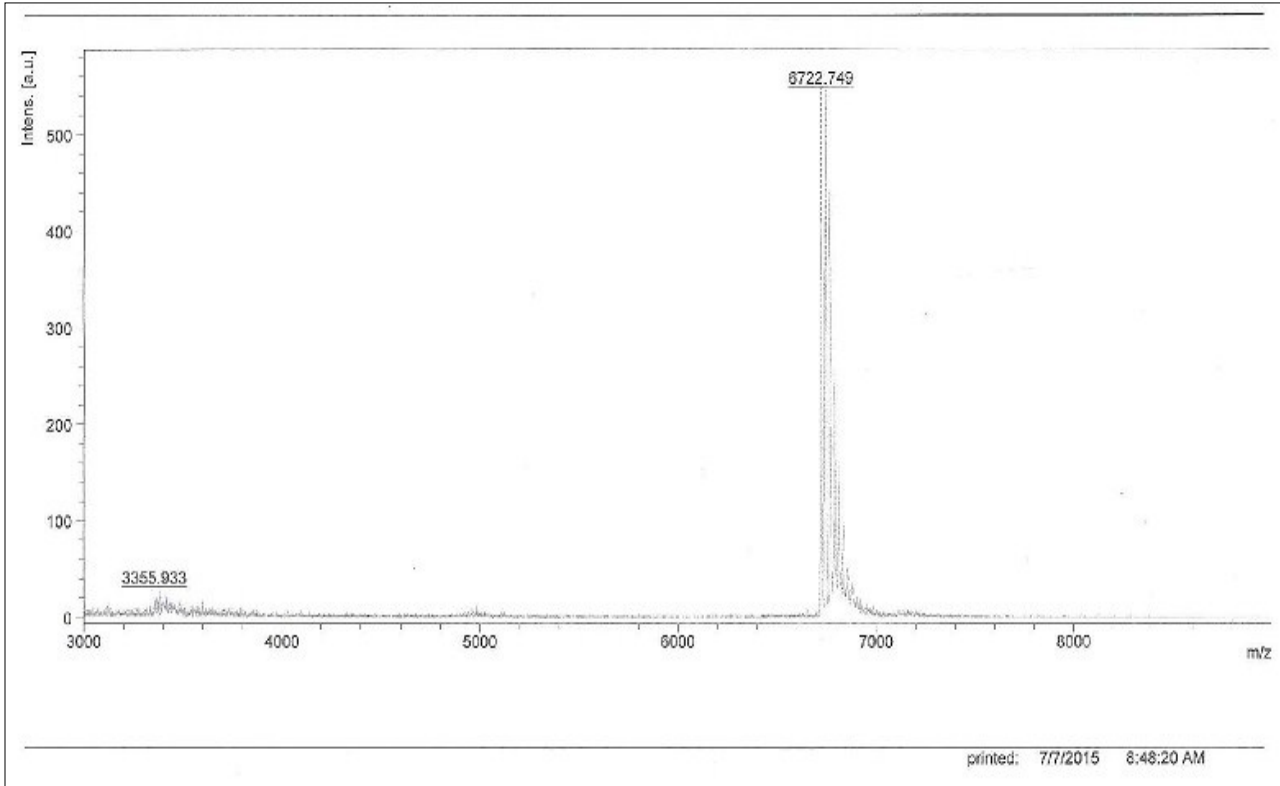

# ON15

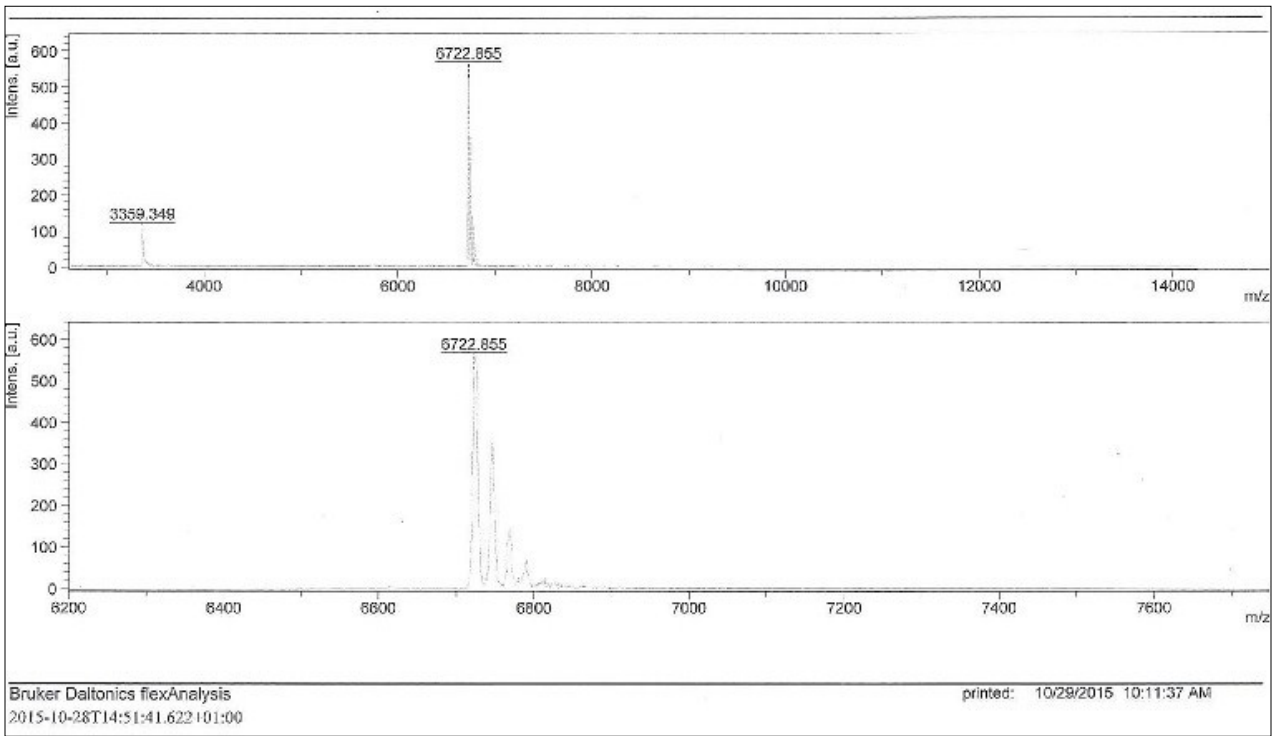

# ON16

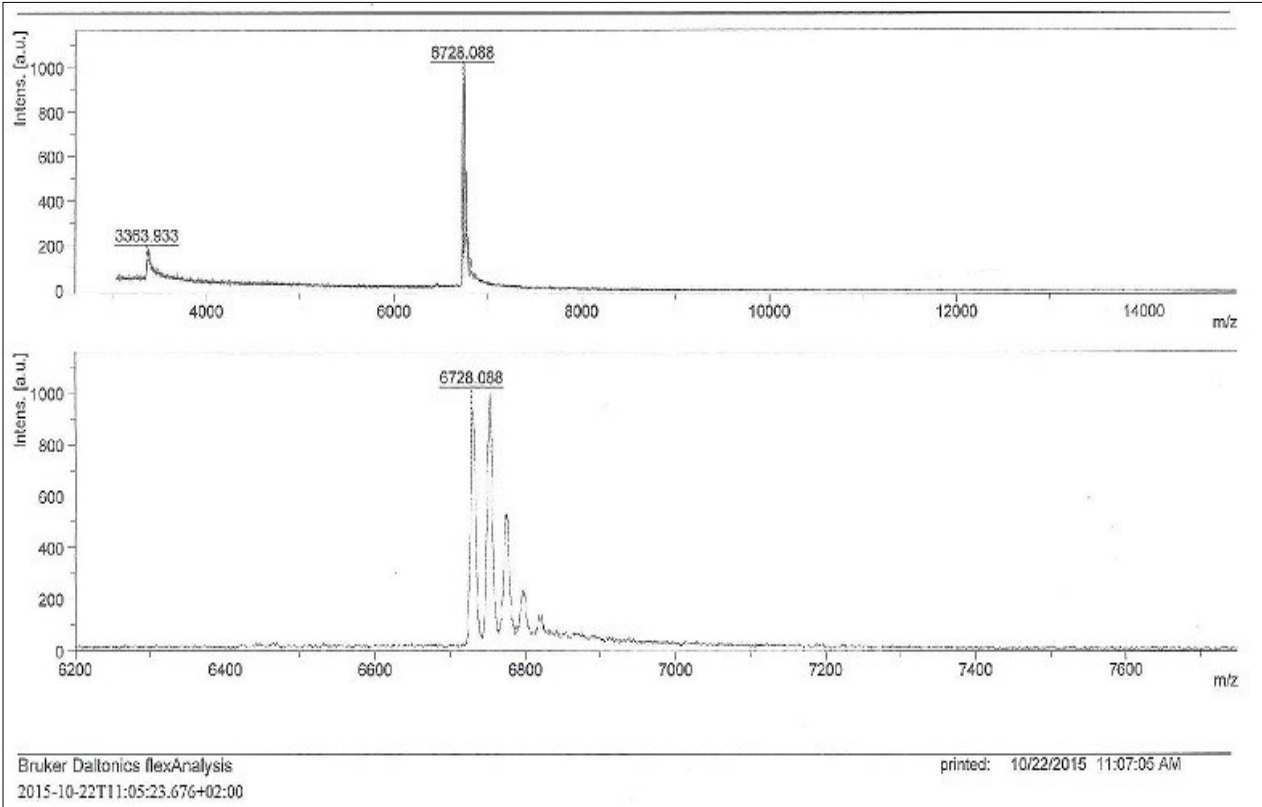

# ON17

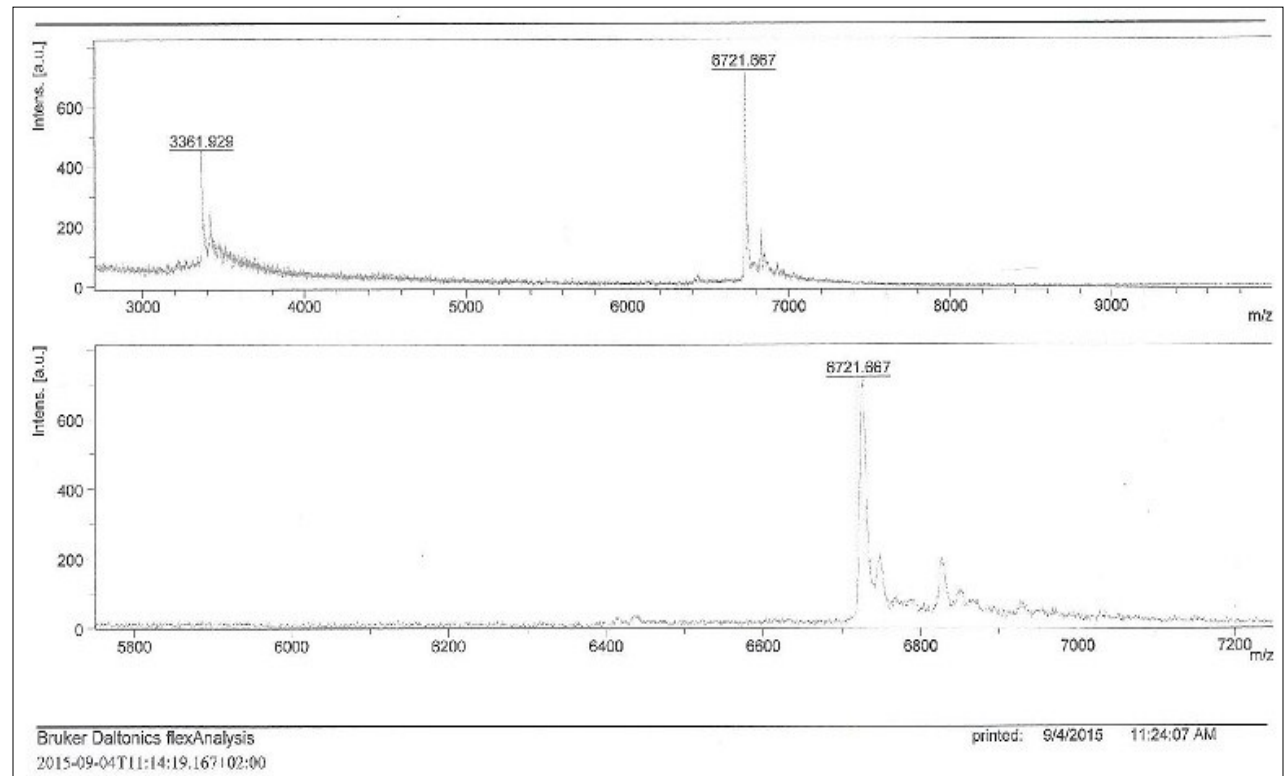

# ON18

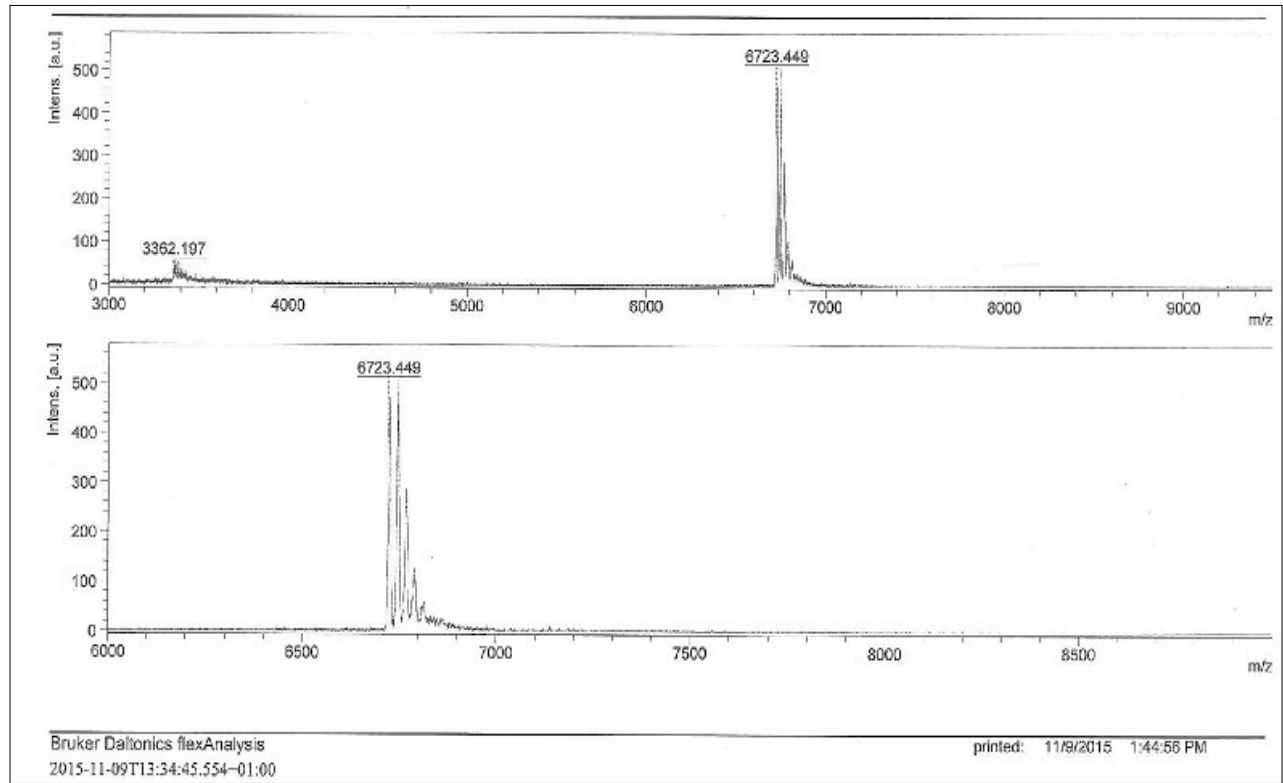

# ON19

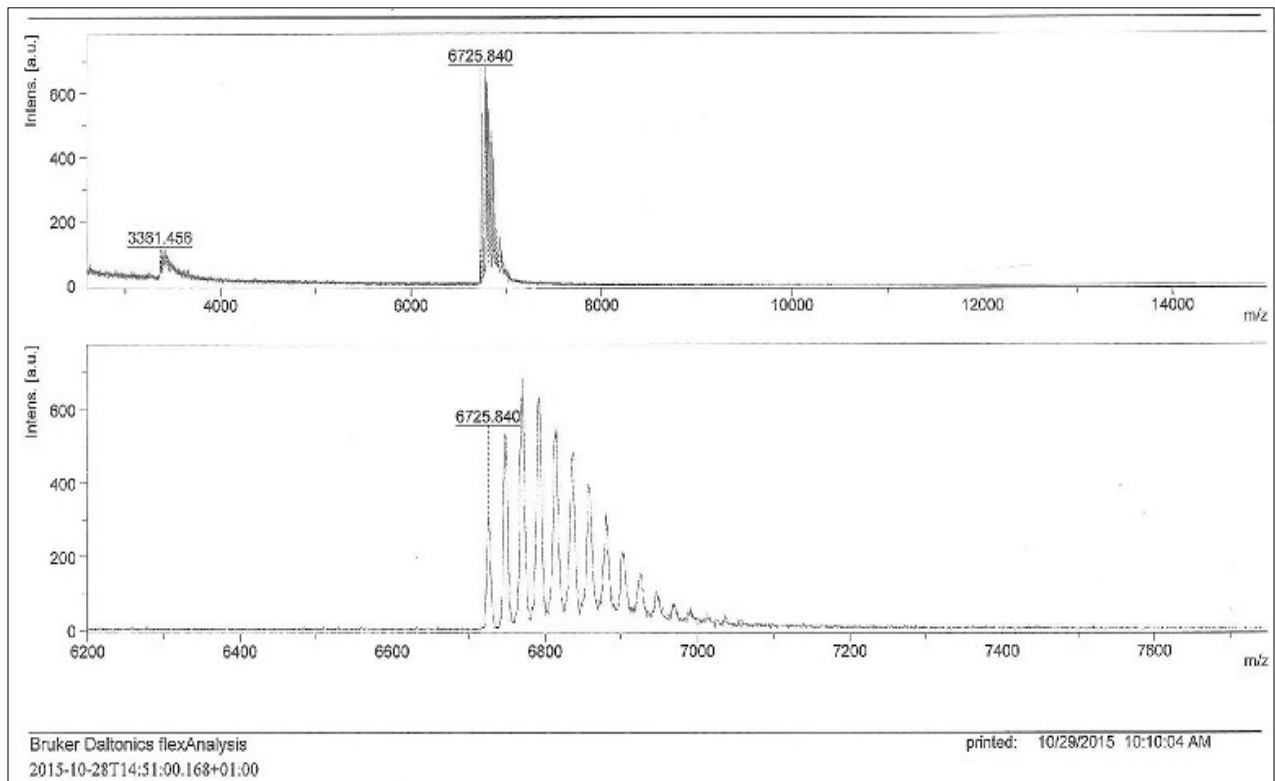



# ON20

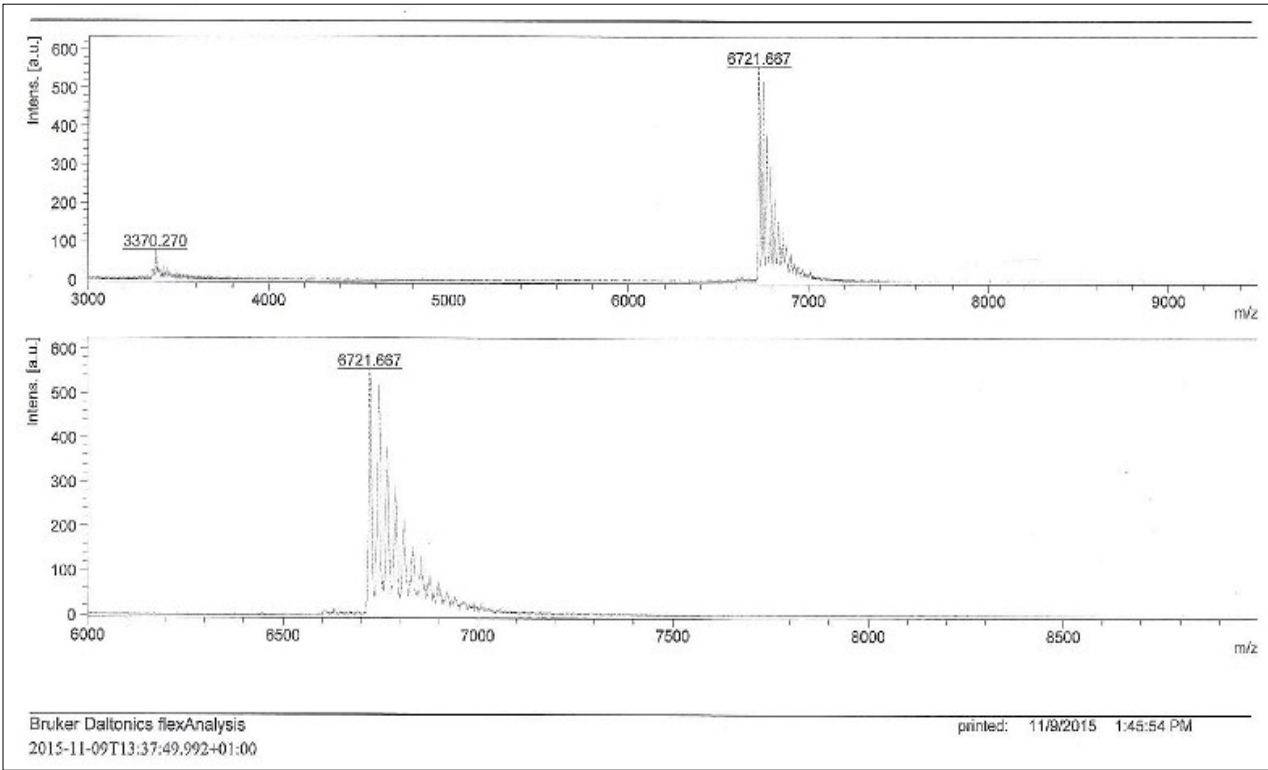

# ON21

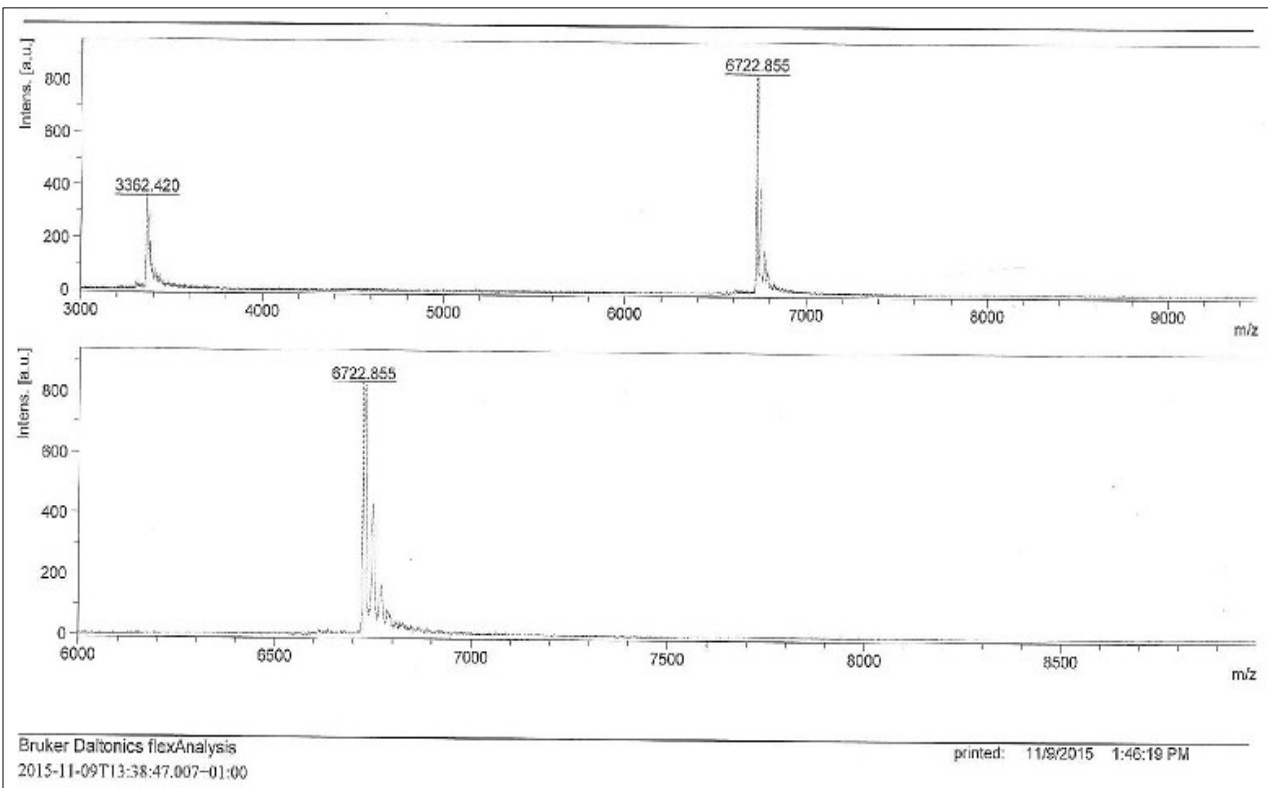

# ON22

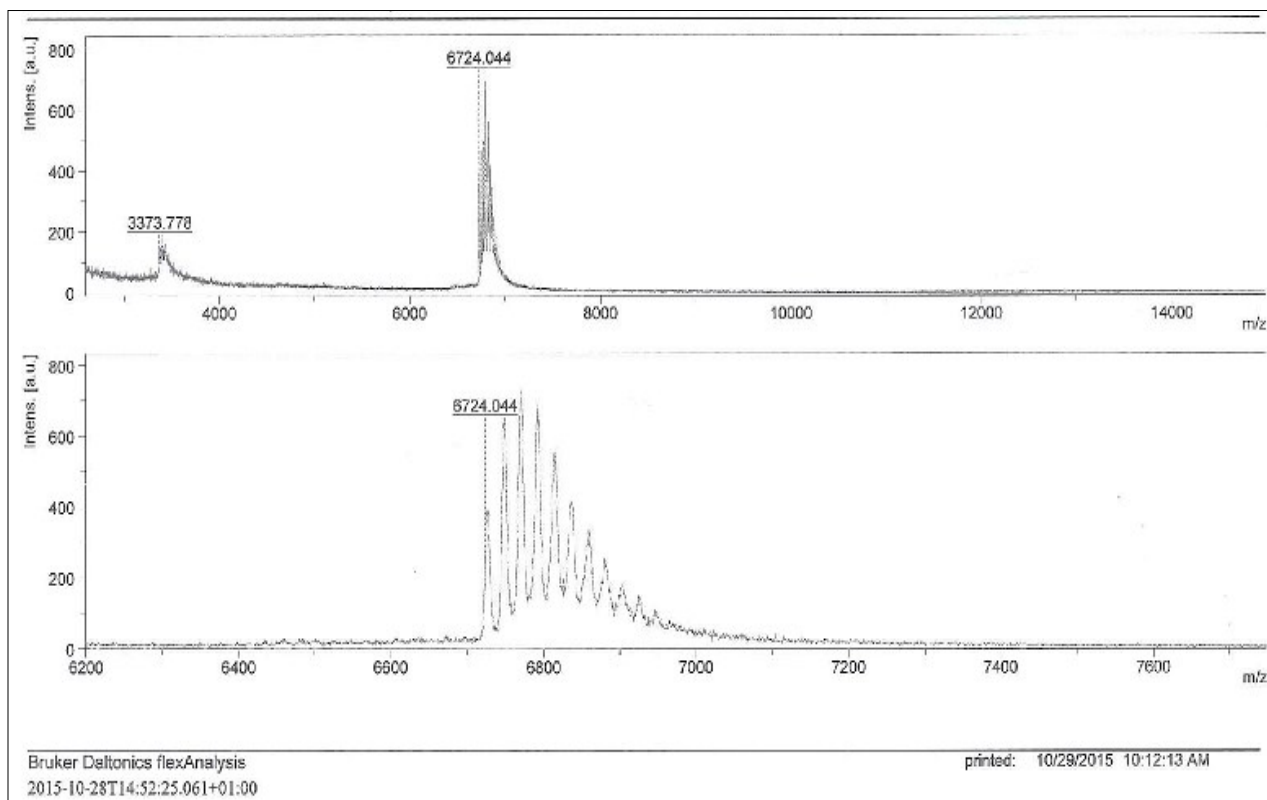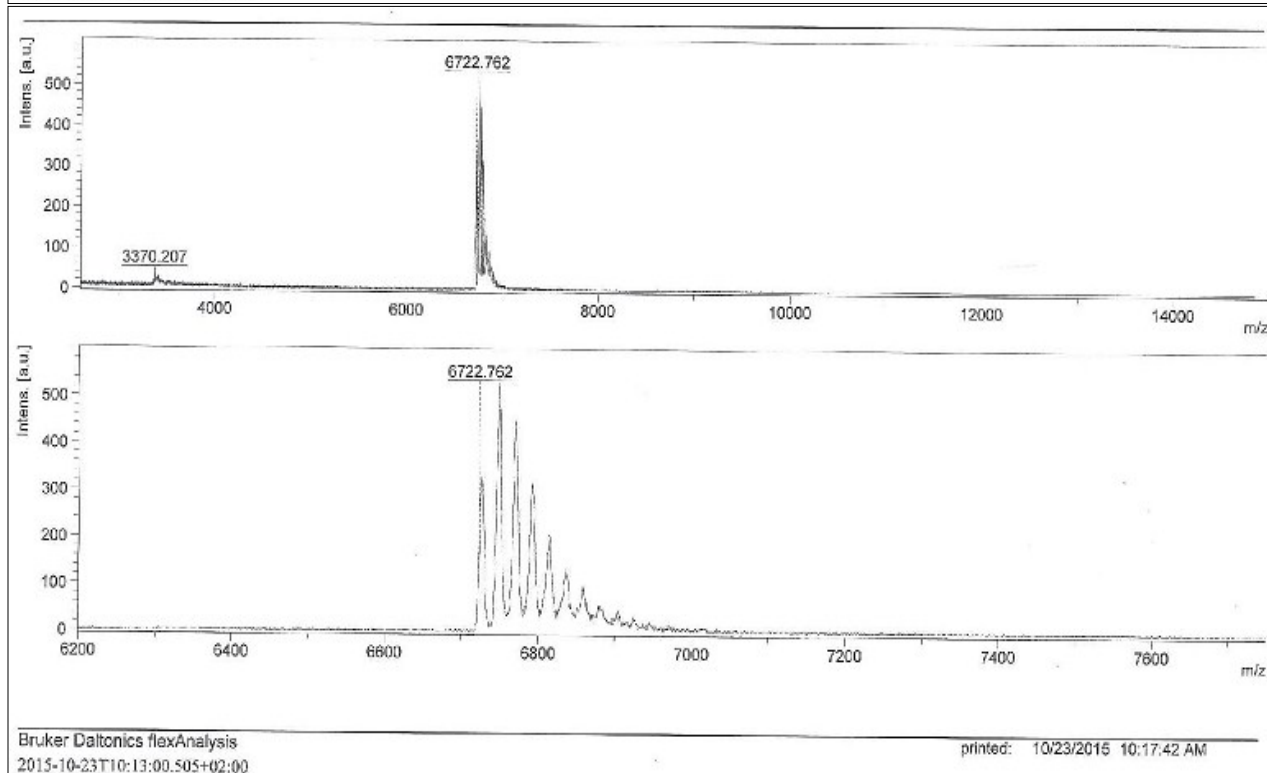

# ON24

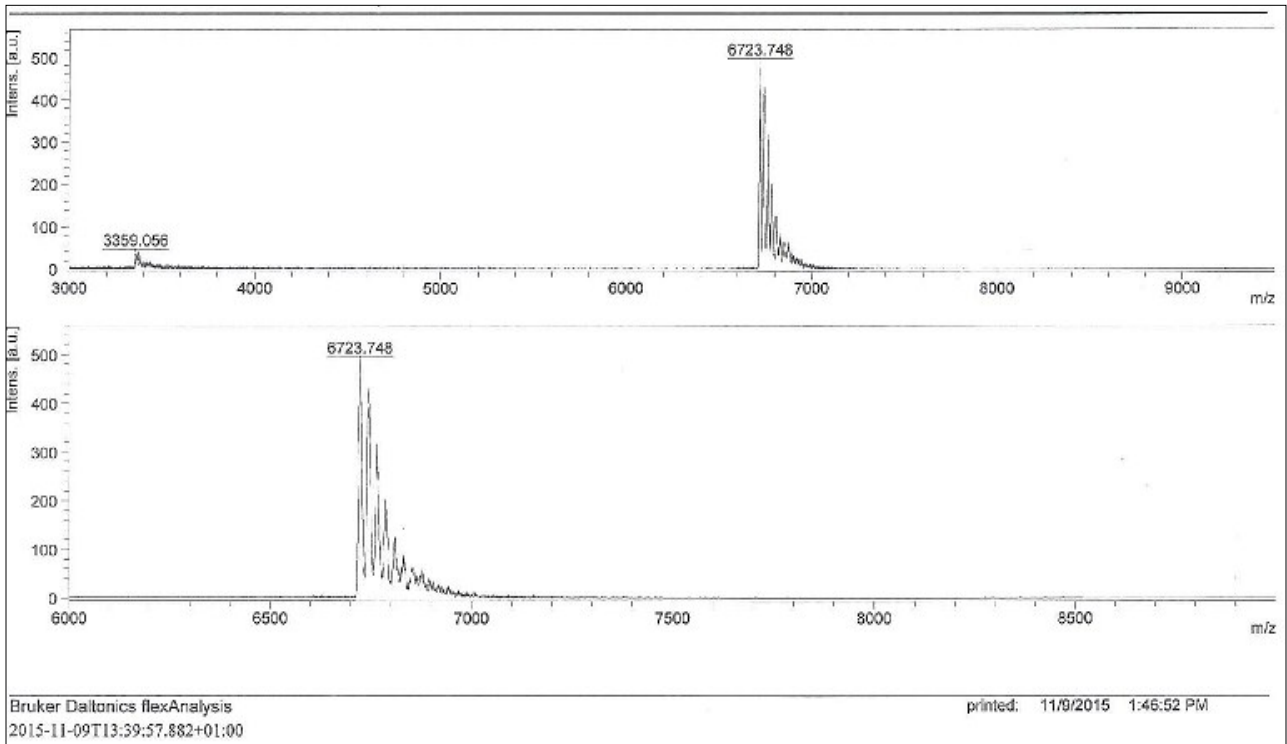

# ON25

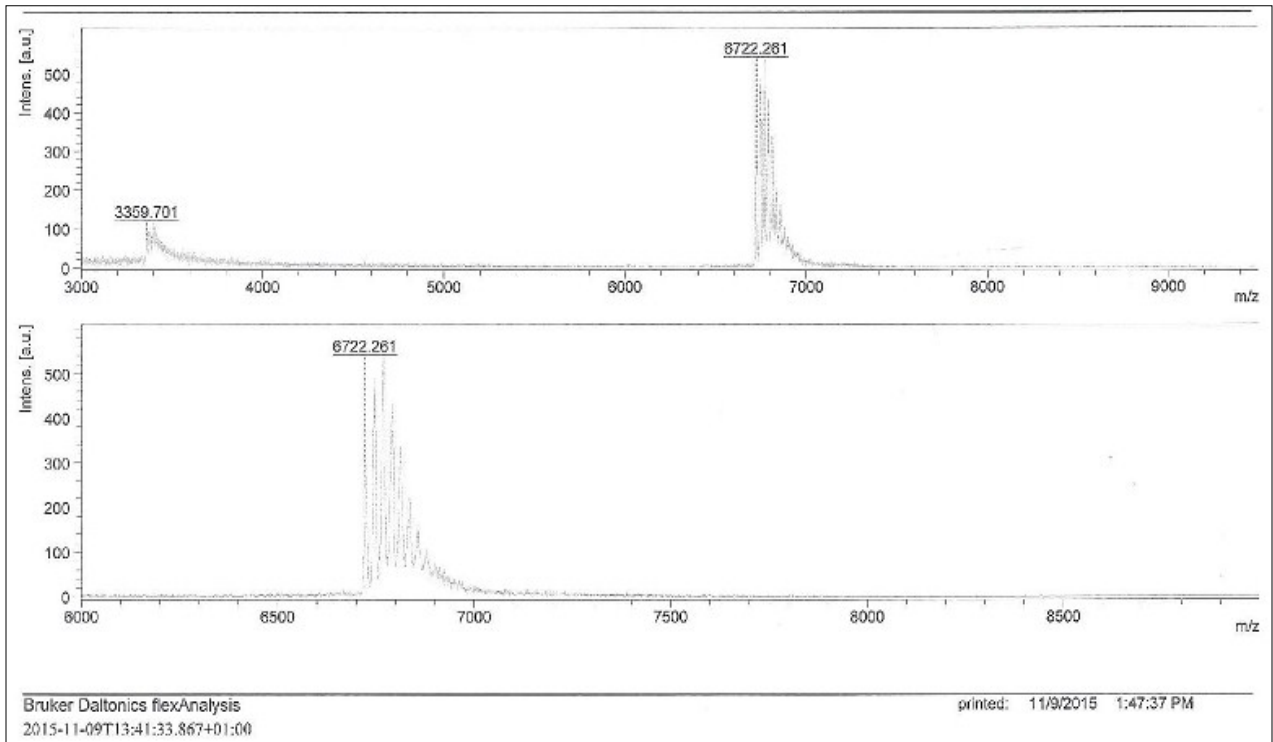

# ON26

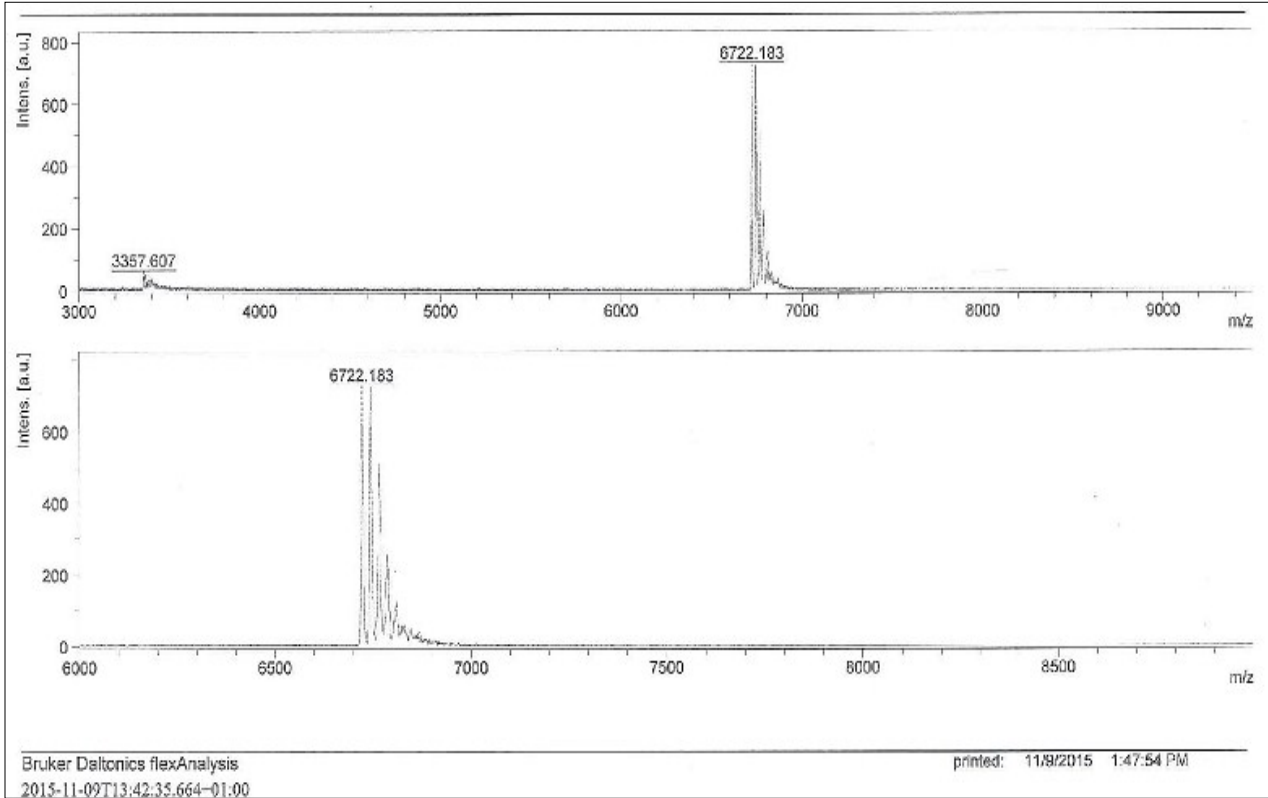

# ON27

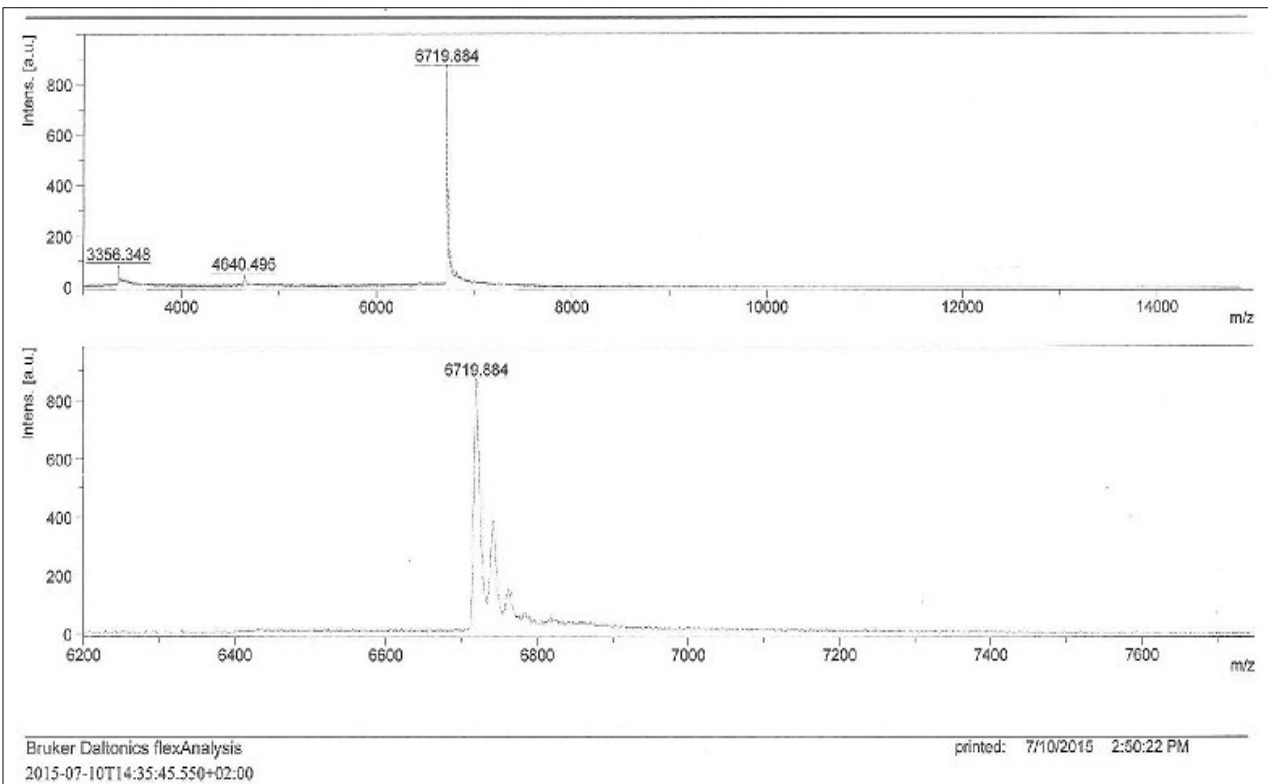

# ON28

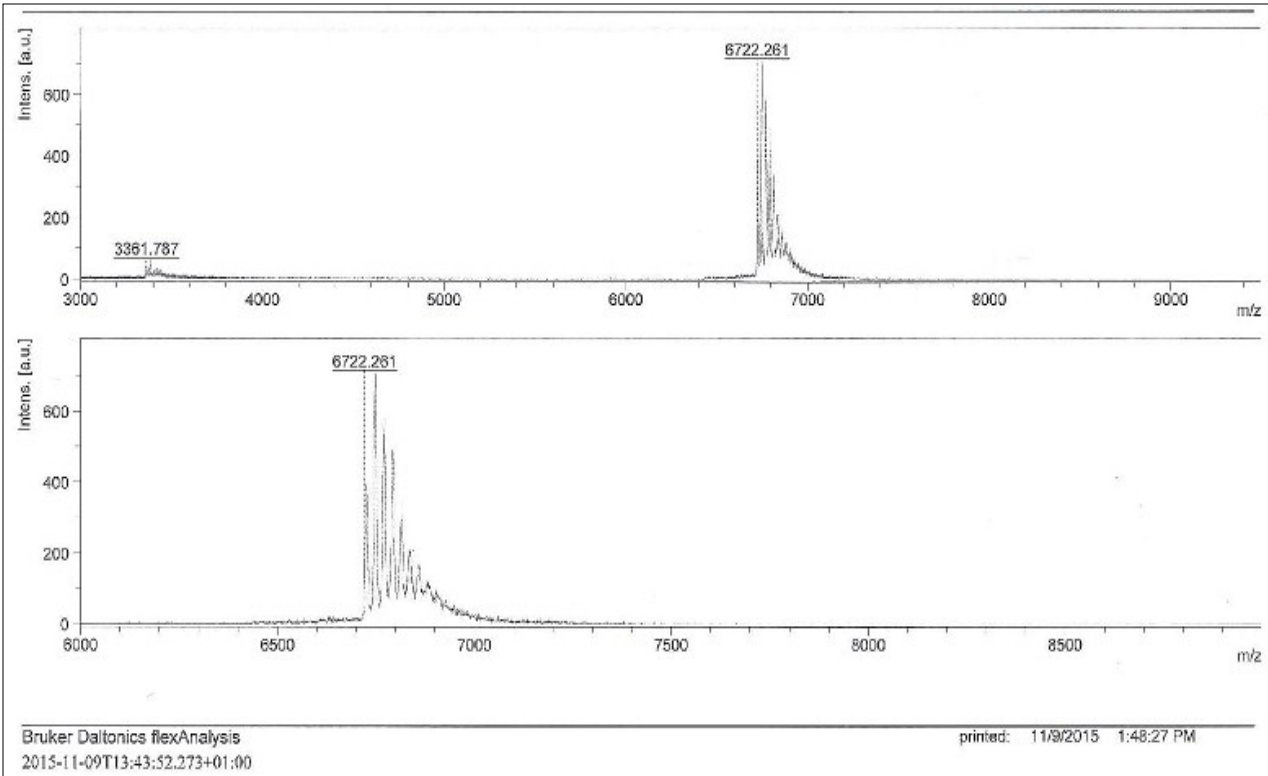

# ON29

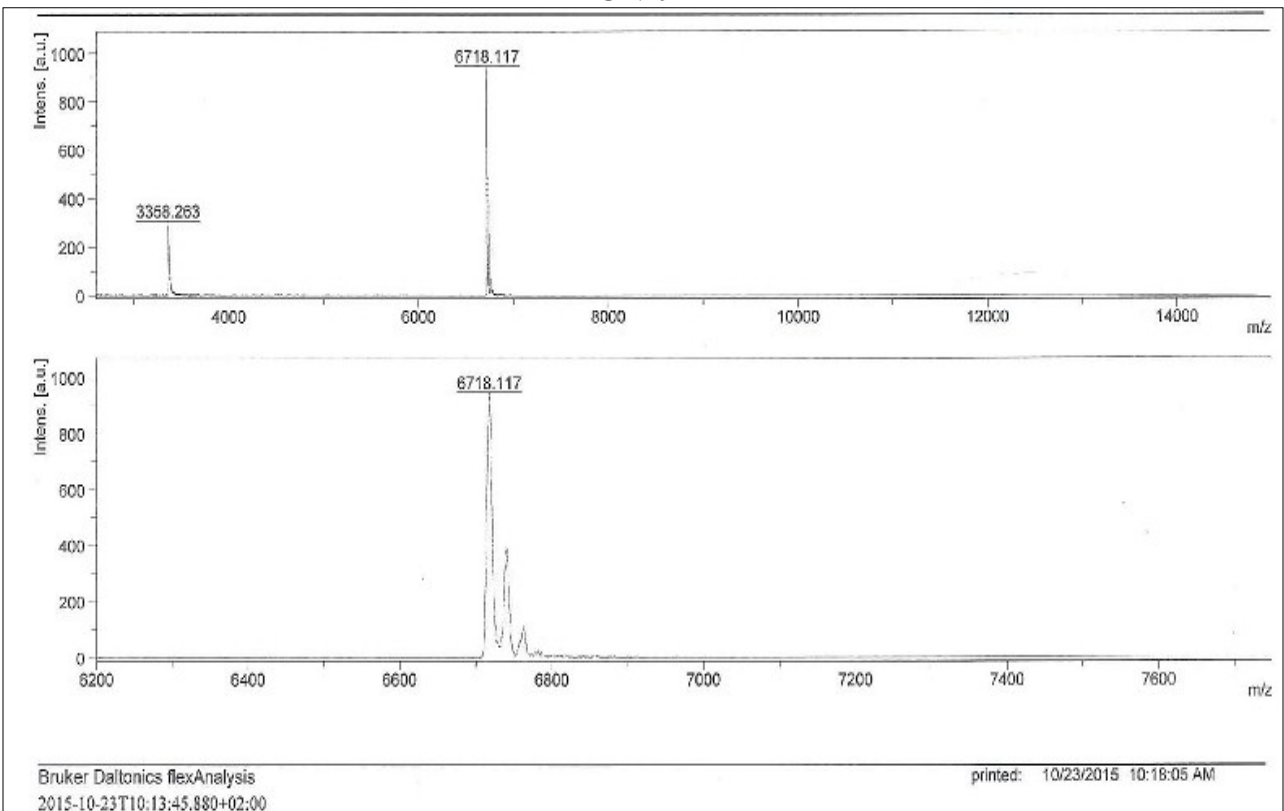

# ON30

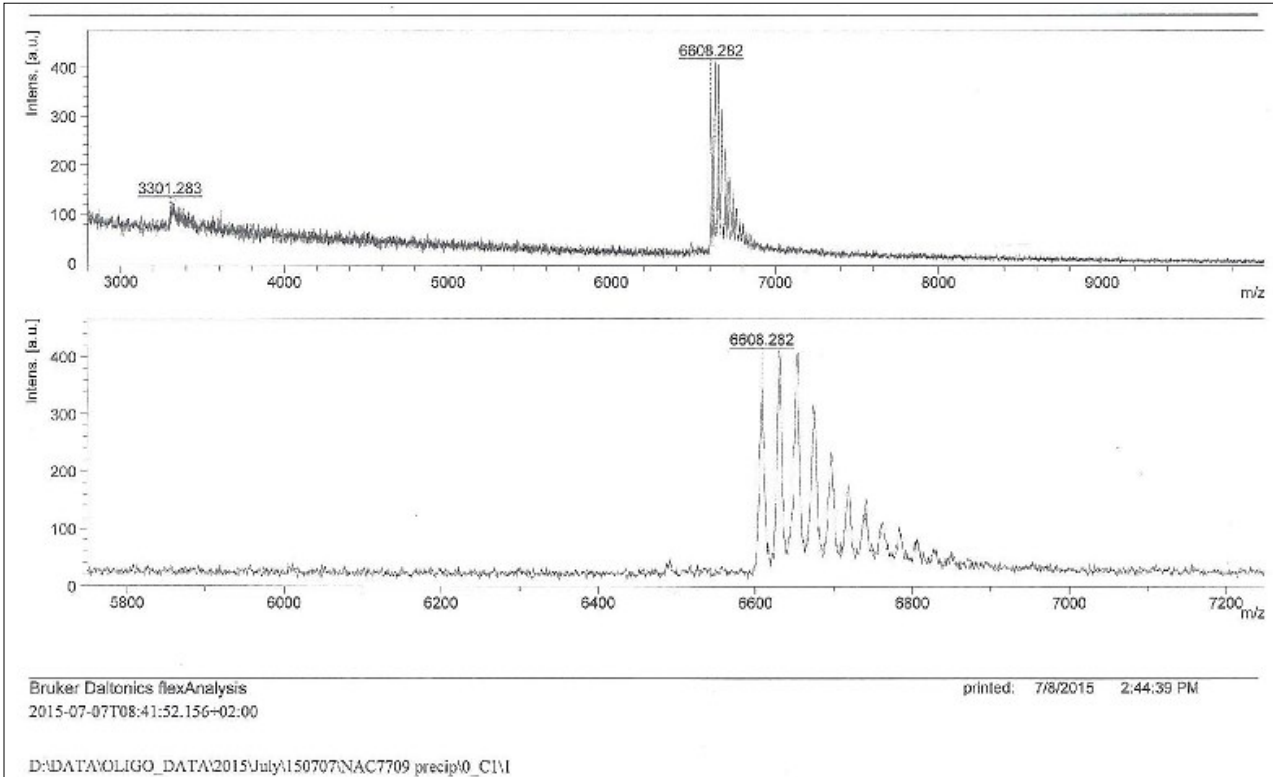

# ON31

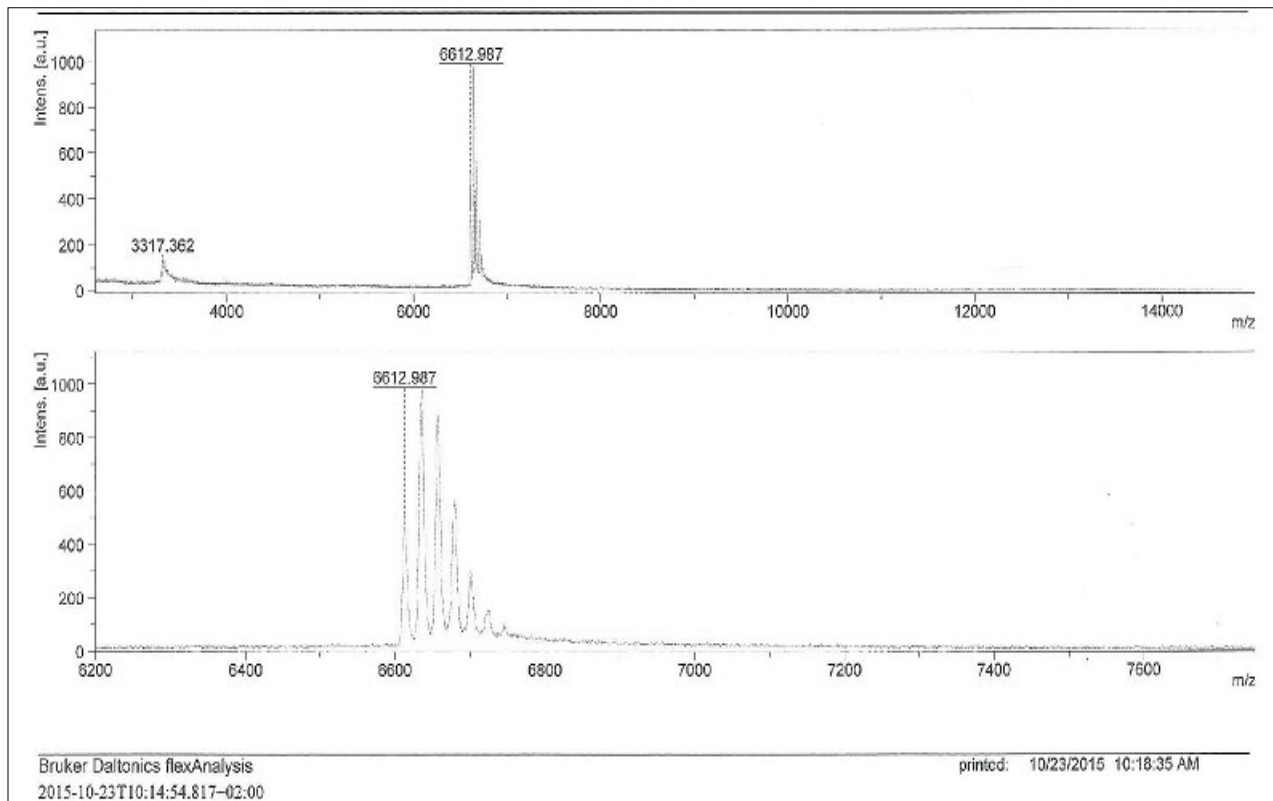

### ON32

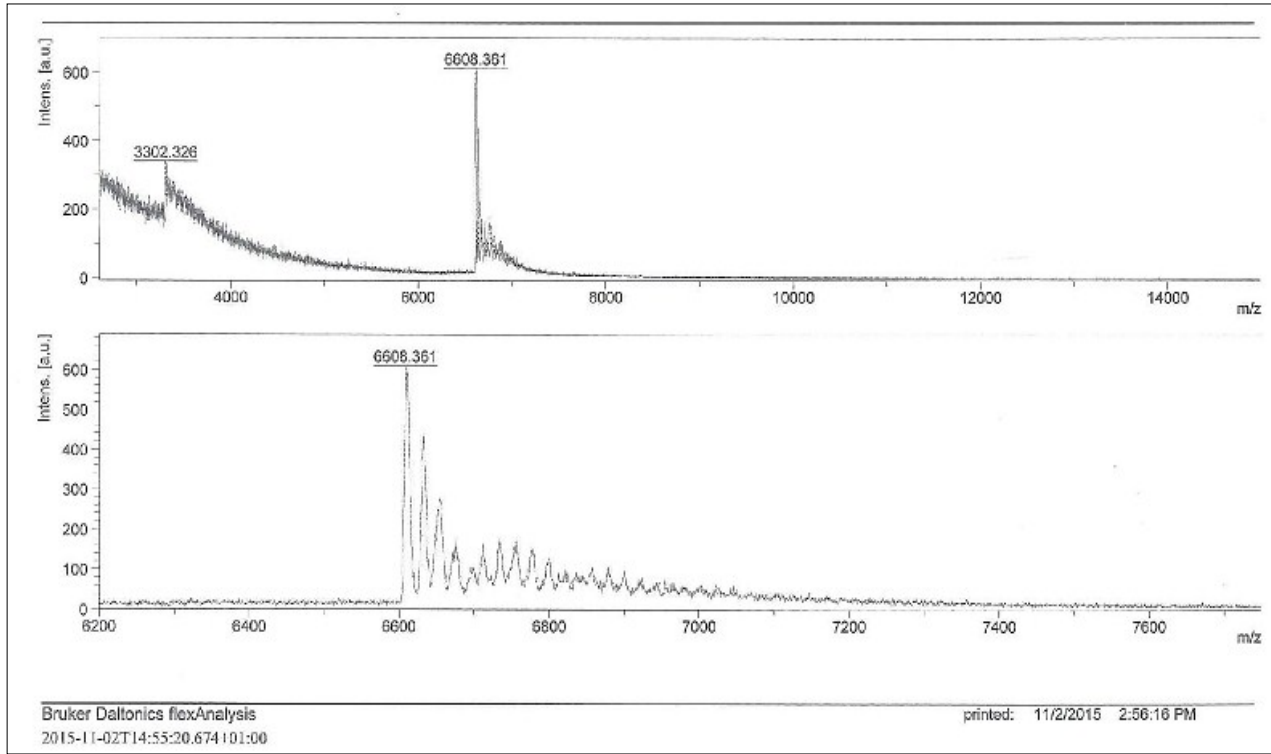

### ON33

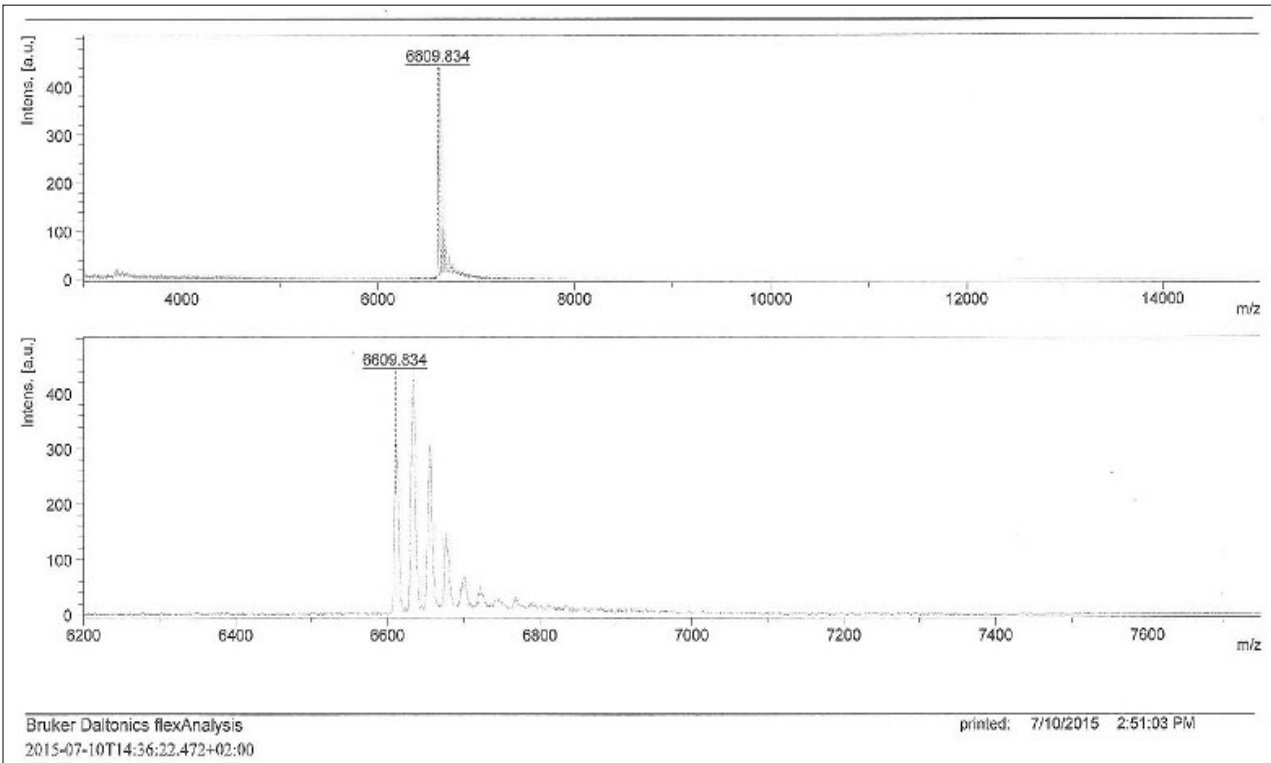

Supplement: c7ob01393k1.pdf [file c7ob01393k1.pdf]
